# 1 **Cis-regulatory modes of *Ultrabithorax* inactivation in butterfly forewings**

2

3 **Amruta Tendolkar<sup>1</sup>, Anyi Mazo-Vargas<sup>1</sup>, Luca Livraghi<sup>1</sup>, Joseph J. Hanly<sup>1,2</sup>, Kelsey C. Van Horne<sup>1</sup>,**  
4 **Lawrence E. Gilbert<sup>3</sup>, Arnaud Martin<sup>1,\*</sup>**

5 <sup>1</sup>: Department of Biological Sciences, The George Washington University, Washington, DC, United States

6 <sup>2</sup>: Smithsonian Tropical Research Institute, Panama

7 <sup>3</sup>: Department of Integrative Biology, University of Texas – Austin, Austin, TX, United States

8

9 \*: Corresponding author:

10 Arnaud Martin, Department of Biological Sciences, The George Washington University, 800 22nd Street  
11 NW, Washington, DC 20052. Email: [arnaud@gwu.edu](mailto:arnaud@gwu.edu)

12

## 13 **ABSTRACT**

14 *Hox* gene clusters encode transcription factors that drive regional specialization during animal  
15 development: e.g. the *Hox* factor *Ubx* is expressed in the insect metathoracic (T3) wing appendages and  
16 differentiates them from T2 mesothoracic identities. *Hox* transcriptional regulation requires silencing  
17 activities that prevent spurious activation and regulatory crosstalks in the wrong tissues, but this has  
18 seldom been studied in insects other than *Drosophila*, which shows a derived *Hox* dislocation into two  
19 genomic clusters that disjoined *Antennapedia* (*Antp*) and *Ultrabithorax* (*Ubx*). Here we investigated how  
20 *Ubx* is restricted to the hindwing in butterflies, amidst a contiguous *Hox* cluster. By analysing Hi-C and  
21 ATAC-seq data in the butterfly *Junonia coenia*, we show that a Topologically Associated Domain (TAD)  
22 maintains a hindwing-enriched profile of chromatin opening around *Ubx*. This TAD is bordered by a  
23 Boundary Element (BE) that separates it from a region of joined wing activity around the *Antp* locus.  
24 CRISPR mutational perturbation of this BE releases ectopic *Ubx* expression in forewings, inducing  
25 homeotic clones with hindwing identities. Further mutational interrogation of two non-coding RNA  
26 encoding regions and one putative *cis*-regulatory module within the *Ubx* TAD cause rare homeotic  
27 transformations in both directions, indicating the presence of both activating and repressing chromatin  
28 features. We also describe a series of spontaneous forewing homeotic phenotypes obtained in  
29 *Heliconius* butterflies, and discuss their possible mutational basis. By leveraging the extensive wing  
30 specialization found in butterflies, our initial exploration of *Ubx* regulation demonstrates the existence  
31 of silencing and insulating sequences that prevent its spurious expression in forewings.

## 32 INTRODUCTION

33

34 *Hox* genes are key specifiers of antero-posterior regional identity in animals, and thus require robust  
35 regulatory mechanisms that confine their expression to well-delimited sections of the body. Their  
36 genomic arrangement into *Hox* gene clusters has provided a rich template for the study of gene  
37 regulation, with mechanisms including chromatin silencing and opening, 3D conformational changes,  
38 and non-coding RNAs (Mallo and Alonso 2013). However, this rich body of work has been almost  
39 exclusively performed in mice and fruit flies. In order to decipher how diverse body plans and  
40 morphologies evolved, we must start assessing the mechanisms of *Hox* gene regulation in a wider  
41 range of organisms.

42 The *Ultrabithorax* (*Ubx*) gene encodes a *Hox* family transcription factor involved in the  
43 specification of segment identities in arthropods (Hughes and Kaufman 2002; Heffer and Pick 2013). In  
44 insects, the conserved expression of *Ubx* in the metathoracic (T3) segment is required for their  
45 differentiation from *Ubx*-free tissues in the mesothorax (T2), and has been a key factor for the  
46 specialization of metathoracic serial appendages including T3 legs (Mahfooz et al. 2007; Refki et al.  
47 2014; Tomoyasu 2017; Feng et al. 2022; Buffry et al. 2023) and hindwings or their derivatives (Tomoyasu  
48 2017; Loker et al. 2021). The mechanisms of *Ubx* segment-specific expression have been intensively  
49 studied in *D. melanogaster* (Mallo and Alonso 2013; Hajirnis and Mishra 2021), where *Hox* genes are  
50 separated into two genomic loci, the Antennapedia (ANT-C, *Antp*) and Bithorax clusters (BX-C). In short,  
51 the BX-C complex that includes *Ubx*, *abdominal-A* (*abd-A*), and *Abdominal-B* (*Abd-B*) is  
52 compartmentalized into nine chromosomal domains that determine the parasegmental expression  
53 boundaries of these three genes (Maeda and Karch 2015). Each boundary is primarily enforced by  
54 insulators that separate Topologically Associating Domains (TADs) of open-chromatin, while also  
55 allowing interactions of enhancers with their target promoters (Postika et al. 2018; Srinivasan and  
56 Mishra 2020). The BX-C locus also includes non-coding RNAs, some of which are processed into  
57 miRNAs known to repress *abd-A* and *Abd-B* (Garaulet and Lai 2015). *Fub-1/bxd* long non-coding RNAs  
58 (lncRNAs) situated 5' of *Ubx* are thought to participate in *Ubx* regulation in the PS5 (posterior T3 to  
59 anterior A1) parasegment (Ibragimov et al. 2022). An intronic lncRNA dubbed *lncRNA:PS4* is expressed  
60 in the PS4 parasegment (posterior T2 - anterior T3), and appears to stabilize *Ubx* in this region in  
61 mutant contexts (Hermann et al. 2022). Little is known about how *Hox* genes are regulated outside of  
62 flies, where they co-localize into a single *Hox* cluster, and where *Antp* and *Ubx* thus occur in contiguous  
63 positions (Gaunt 2022; Mulhair and Holland 2022). A few *Hox*-related miRNAs are evolutionarily  
64 conserved across the locus in arthropods (Pace et al. 2016), and an early study in *Tribolium*  
65 characterized the embryonic expression of a *Hox* cluster non-coding transcripts (Shippy et al. 2008).

66 These knowledge gaps lead us to consider the use of butterflies and moths (Lepidoptera) as  
67 alternative model systems for the study of *Ubx* function and regulation. Lepidopteran forewings and  
68 hindwings are functionally and morphologically differentiated, and CRISPR mosaic knock-outs (mKOs)  
69 showed that *Ubx* is necessary for the specification of hindwing color patterns, shape, and venation  
70 (Tendolkar et al. 2021). In three species of nymphalid butterflies (*Heliconius erato*, *Junonia coenia*, and  
71 *Bicyclus anynana*), CRISPR-mediated loss-of-function of *Ubx* induces regional-specific homeotic  
72 transformations of hindwing patterns into their forewing counterpart (Matsuoka and Monteiro 2018;  
73 Tendolkar et al. 2021), reminiscent of homeotic aberrations that are sporadically observed in butterfly  
74 wings (Sibatani 1983; Nijhout and Rountree 1995). The ectopic activation of *Ubx* into the pupal forewing  
75 results in the gain of hindwing features, suggesting *Ubx* is sufficient to drive T3-like identity when

76 expressed in T2 (Lewis et al. 1999; Tong et al. 2014). Besides its roles in adult wing differentiation, *Ubx*  
77 is also known to repress thoracic leg identity in transient embryonic appendages of the first abdominal  
78 segment, called pleuropods (Zheng et al. 1999; Masumoto et al. 2009; Tong et al. 2017; Tendolkar et al.  
79 2021; Matsuoka et al. 2022).

80 The general organization of Hox gene clusters has been well described in Lepidoptera, but their  
81 regulation has been seldom studied. Lepidopteran genomes have accumulated divergent *Hox3* copies,  
82 named *Shox* genes, that are required during early embryonic development but do not appear to play  
83 homeotic functions (Ferguson et al. 2014; Livraghi 2017; Mulhair et al. 2022). An lncRNA and two  
84 miRNAs were identified in the intergenic region between *abd-A* and *Abd-B* in the silkworm (Wang et al.  
85 2017, 2019). In butterfly wings, the regulation of *Ubx* shows strong patterns of segment-specific  
86 regulation at two levels. First, the *Ubx* transcript has been consistently identified as the most  
87 differentially expressed mRNA between the two wing sets (Hanly et al. 2019; Wang et al. 2022). Second,  
88 comparison of ATAC-seq signals reveal that forewing vs. hindwing have identical open-chromatin  
89 profiles during development across the genome, except at the *Ubx* gene itself (Lewis and Reed 2018;  
90 van der Burg et al. 2019). Thus, the ability of the *Ubx* locus to be robustly activated in hindwings and  
91 repressed in forewings is likely driving most subsequent differences between these tissues. In this  
92 study, we provide an initial assessment of the regulation of the *Ubx* locus during butterfly wing  
93 development. To do this, we leverage genomic resources and CRISPR mutagenesis with a focus on two  
94 laboratory species belonging to the Nymphalinae sub-family, *J. coenia* and *Vanessa cardui* (Livraghi et  
95 al. 2017; Martin et al. 2020; van der Burg et al. 2020; Mazo-Vargas et al. 2022). We identify putative  
96 regulatory regions likely involved in the repression and activation of *Ubx* expression, and discuss the  
97 potential mechanisms restricting it to hindwings. Finally, we describe a collection of spontaneous wing  
98 homeotic mutants in *Heliconius spp.* and elaborate on the categories of mutations that could underlie  
99 these phenotypes by misregulating *Ubx*.

## 100 RESULTS

### 101 102 Gene expression at the *Ubx* locus during wing development

103 We provide annotations of the *Ubx* genomic region in four Nymphalinae butterflies (**Fig. 1A**). These  
104 feature existing genomic resources for our model species *J. coenia* and *V. cardui* (van der Burg et al.  
105 2020; Lohse et al. 2021b; Zhang et al. 2021), as well as for *Aglais (Nymphalis) io* (Lohse et al. 2021a). The  
106 publicly available annotations for these three species include evidence from developmental  
107 transcriptomes, and we added to this set a manual annotation of the *Ubx* locus from the oak leaf butterfly  
108 *Kallima inachus*, for which forewing vs. hindwing transcriptomes have been sequenced across a replicated  
109 developmental time series (Yang et al. 2020; Wang et al. 2022).

110 All Nymphalinae show a similar organization of the region spanning *Ubx*. Interestingly, the first  
111 intron of *Ubx* encodes a long non-coding RNA in opposite orientation to *Ubx*, that we dub here  
112 *lncRNA:Ubx-IT1* (abbr. *Ubx-IT1*), based on the recommended nomenclature (Seal et al. 2022).  
113 Orthologous versions of *Ubx-IT1* are detected in most NCBI RefSeq genome annotations throughout  
114 Lepidoptera (e.g. the ncRNA *NCBI:XR\_960726* in *Plutella xylostella*), implying it is a conserved feature  
115 of the *Ubx* locus in this insect order. Finally, both annotations from *V. cardui*, *A. io*, and *J. coenia* show a  
116 long intergenic non-coding transcript starting in antisense orientation about 10-15 kb 5' of *Ubx*, that we  
117 dub here *lincRNA:Ubx-AS5'* (abbr. *Ubx-AS5'*). This transcript was neither detected in *K. inachus*  
118 transcriptomes nor in RNA datasets outside of the Nymphalinae sub-family, and could be specific to  
119 this lineage.

120 Next we reanalyzed the *K. inachus* wing transcriptomes (Wang et al. 2022), and profiled the  
121 expression of *Ubx* region transcripts during wing development (**Fig. 1B**). As expected from previous  
122 studies (Hanly et al. 2019; Paul et al. 2021; Merabet and Carnesecchi 2022; Wang et al. 2022), *Ubx*  
123 showed a strong expression bias in hindwings, spanning the larval imaginal disks to the intermediate  
124 pupal stage. Of note, *Ubx* is confined to the peripodial membranes of insect T2 wing appendages  
125 (Weatherbee et al. 1998, 1999; Prasad et al. 2016), which may explain residual detection in some of the  
126 forewing samples here. *Ubx-IT1* was significantly enriched in hindwings compared to forewings, albeit  
127 at ~100-fold lower count levels than *Ubx* in the same samples. The *Hox* gene *Antp* showed a minor  
128 forewing enrichment, confirming that while *Ubx* expression is robustly repressed in T2 forewing tissues,  
129 *Antp* expression is permitted in both T2 and T3 appendages (Matsuoka and Monteiro 2021, 2022; Paul  
130 et al. 2021). Expression of *abd-A* was undetected in most wing samples.



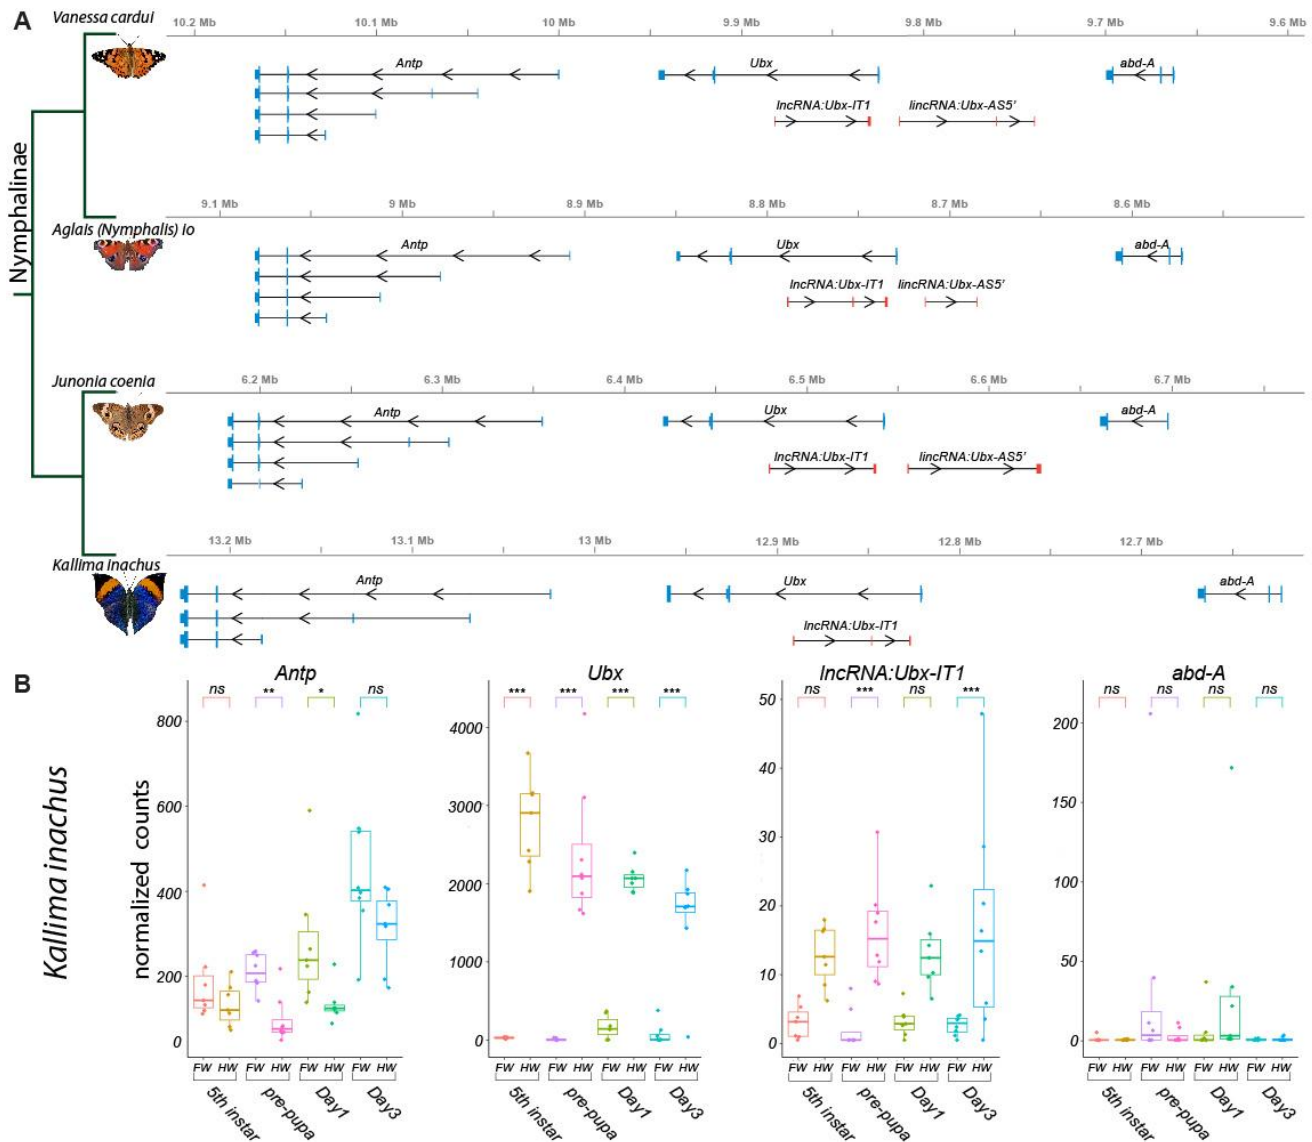

131  
132  
133  
134  
135  
136  
137  
138

**Figure 1. Annotation of the *Ubx* genomic interval in four butterflies of the Nymphalinae sub-family. (A)** Genomic intervals spanning *Antp*, *Ubx*, and *abd-A*, featuring published transcript annotations from NCBI Reference Genomes of *V. cardui* and *A. io*, and manual re-annotations of the *J. coenia* and *K. inachus* genomes using published RNAseq dataset (see Methods). Exons are shown with coding (thick) and non-coding (thin) sections. No *lincRNA:Ubx-AS5'* transcripts were detected in *K. inachus*. **(B)** Expression profiling of transcripts of the *Ubx* region in *K. inachus*, based on a reanalysis of published wing RNA-seq transcriptomes (Wang et al. 2022). Expression levels are plotted as DESeq2 normalized counts plots. Pairwise Wald tests adjusted for multiple test correction each assess differential expression between forewings and hindwings. ns : non-significant ; \* :  $p < 0.05$  ; \*\* :  $p < 0.01$  ; \*\*\* :  $p < 0.001$ .

### 139 **Chromatin 3D conformation reveals a Boundary Element between *Antp* and *Ubx***

140 Genome-wide Hi-C sequencing can be used to generate heatmaps that capture the conformation of 3D  
141 chromatin in tissues, and has been used extensively to study *Drosophila Hox* cluster organisation into  
142 TADs that prevent regulatory crosstalk between adjacent genes (Ibragimov et al. 2022; Moniot-Perron et  
143 al. 2023). Here we used Hi-C to assess the 3D chromatin architecture of the *Hox* cluster interval in the  
144 butterfly *J. coenia*, using existing datasets that were generated from fifth instar larval forewings (van der  
145 Burg et al. 2020; Mazo-Vargas et al. 2022). In larval forewings, the *Hox* chromatin conformation  
146 landscape consists of three well-delimited TADs, the first one spanning *proboscipedia (pb)* to *Sex comb*  
147 *reduced (Scr)*, the second one around *Antp*, and the third one *Ubx*, *abd-A*, and *Abd-B* (**Figs. 2 and 3A**).  
148 A Boundary Element (BE), was robustly called (see Methods) at the region separating the *Antp* and *Ubx*  
149 TADs, situated in the *Ubx* last intron. Because TAD boundary prediction has a coarse resolution, we  
150 arbitrarily define the candidate BE region as a 15-kb interval centered in the *Ubx* last intron, and dub it  
151 *Antp-Ubx\_BE*. A binding motif analysis identified 4 CTCF binding sites in a 1-kb interval within *Antp-*  
152 *Ubx\_BE*, two of which were found in a tightly linked, convergent orientation (**Fig. S1**), which is consistent  
153 with TAD insulating role in mediating chromatin loop-extrusion (Guo et al. 2015). This concordance  
154 between Hi-C profiling and CTCF motif prediction thus indicates that *Antp-Ubx\_BE* region functions as  
155 an insulator between regulatory domains of *Antp* and *Ubx*.

156

### 157 **Differential forewing vs. hindwing chromatin-opening across the *Antp-Ubx* interval**

158 In flies, the *Ubx/abd-A* section is organized into regulatory domains that display differential activities  
159 across the antero-posterior axis, following what has been called the open-for-business model (Maeda  
160 and Karch 2015; Gaunt 2022). Here we tested if this pattern extends to butterfly species with a  
161 contiguous *Hox* cluster. To do this we used ATAC-seq datasets from *J. coenia* forewing (T2), hindwing  
162 (T3), and whole-head tissues sampled across fifth instar larval and early pupal stages, similarly to  
163 previous studies (van der Burg et al. 2020; Mazo-Vargas et al. 2022; Van Belleghem et al. 2023). These  
164 data reveal that chromatin opening along the *Antp/Ubx/abd-A* interval is partitioned into several  
165 regions showing a transition of T2 to T3 activity (**Fig. 2B**). From the anterior to posterior *Hox* colinear  
166 order (*i.e.* from *Antp* towards *abd-A*), chromatin-opening forms a block of forewing-enriched activity  
167 close to *Antp* and its 5' region, to a block of activity in both forewings and hindwings that stops at the  
168 *Antp-Ubx\_BE*. This region is consistent with the fact that *Antp* is expressed in both wing pairs (**Fig. 1B**).  
169 From *Antp-Ubx\_BE*, the interval including *Ubx* and a large upstream region is strongly enriched for  
170 hindwing opening, consistently with previous studies that found it to be the only genomic region  
171 showing this pattern (Lewis and Reed 2018; van der Burg et al. 2019). Last, the region surrounding *abd-*  
172 *A* is devoid of differential open-chromatin activity between forewings and hindwings, in accordance with  
173 the exclusion of its expression from thoracic segments (Warren et al. 1994; Tong et al. 2014)

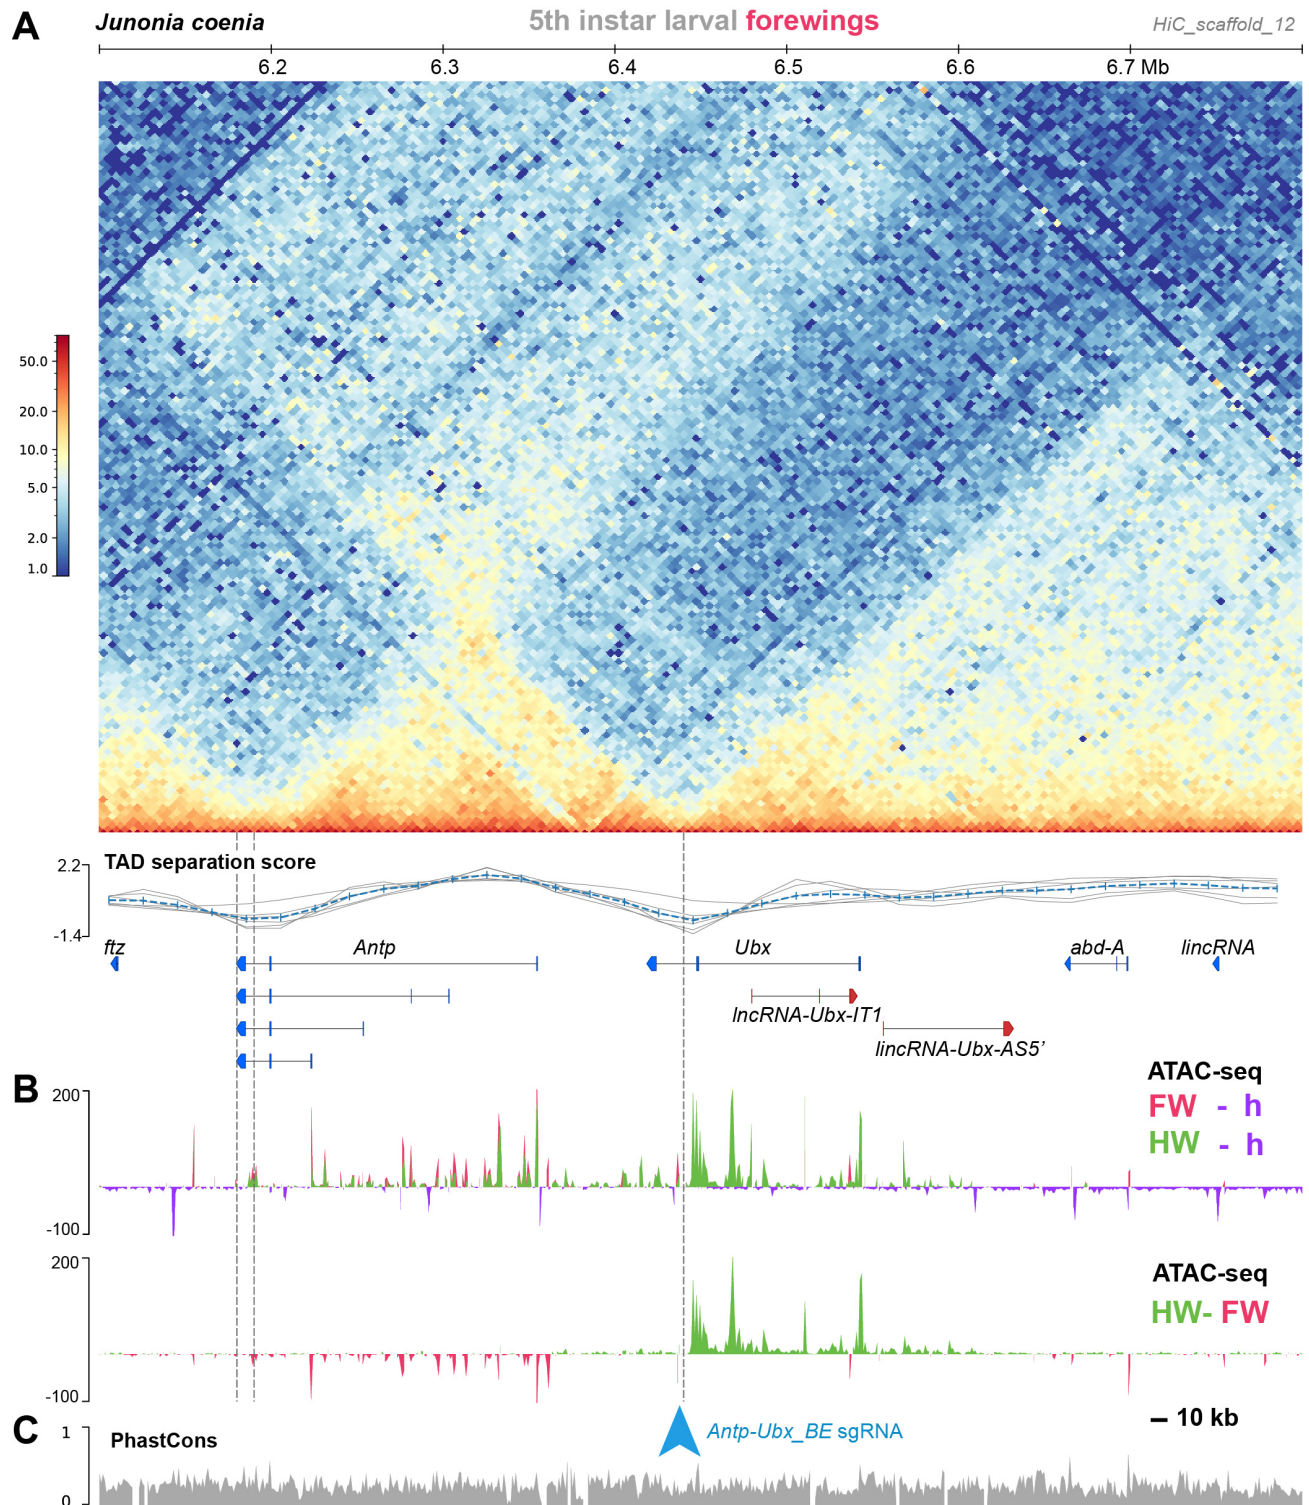

174 **Figure 2. A region of hindwing-specific chromatin-opening is bordered by a TAD BE in the last intron of *Ubx*.**  
 175 **(A)** Hi-C contact heatmap in fifth instar forewings of *J. coenia* and TAD separation scores around *Ubx*. A TAD boundary element (*Antp-Ubx\_BE*)  
 176 is inferred in the last intron of *Ubx* (vertical dotted line). **(B)** Differential ATAC-seq profiles, re-analyzed from a previous dataset (Mazo-Vargas  
 177 et al. 2022). Top : open-chromatin profiles of forewings (FW, magenta), and hindwings (HW, green), respectively subtracted from larval head  
 178 signal (purple, negative when wing signals at background-level). Bottom : subtractive ATAC-seq profile (HW-FW) revealing hindwing-enriched  
 179 chromatin in the *Ubx* locus. *Antp-Ubx\_BE* is in the vicinity of an isolated region of forewing-enriched opening (blue arrowhead). **(C)** PhastCons  
 180 genomic alignment scores, with overall alignability suggesting minimal structural variation across this interval in Lepidoptera and Trichoptera.



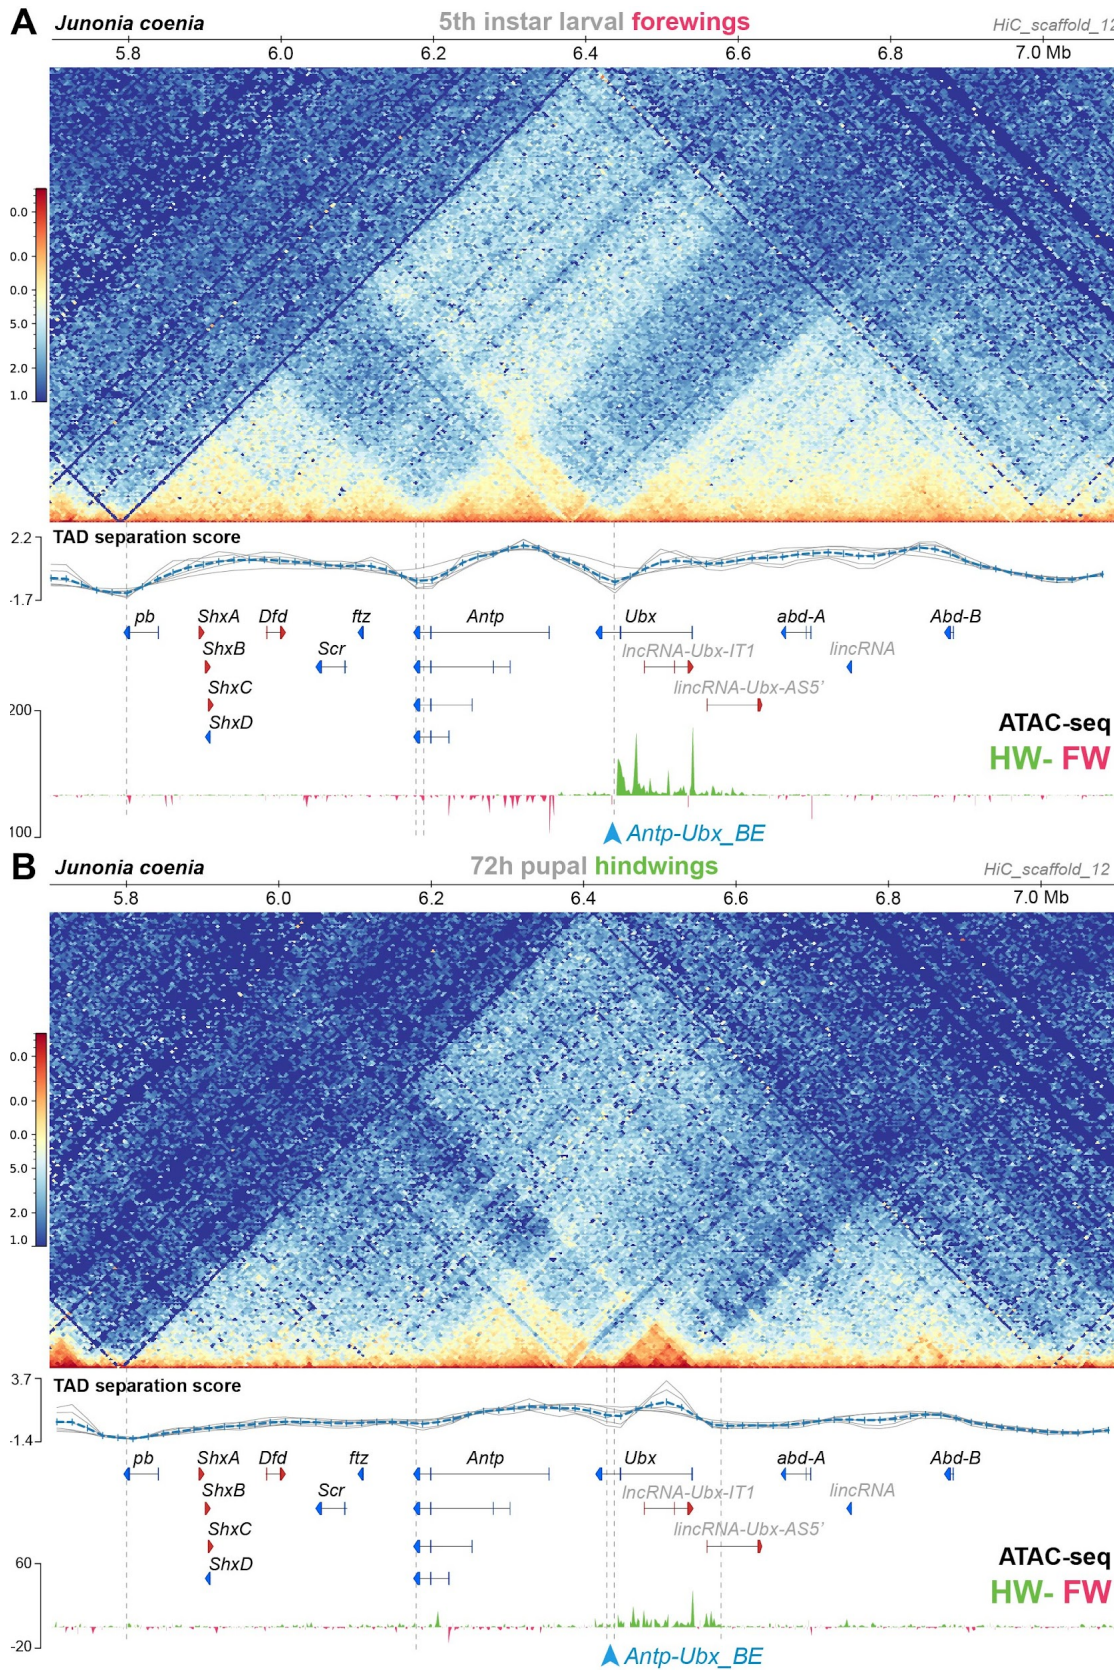

181 **Figure 3. Hindwing-enriched chromatin-opening around *Ubx*, and the *Antp-Ubx\_BE* boundary, are both maintained in mid-pupal**  
182 **hindwings. (A)** Hi-C heatmap in *J. coenia* fifth instar larval forewings, and subtractive ATAC-seq profiles at this stage (hindwing-forewing), as  
183 expanded from Fig. 2 across the *Hox* cluster. **(B)** Hi-C heatmap in *J. coenia* mid-pupal hindwings, and subtractive ATAC-seq profiles at this  
184 stage (forewing-hindwing). Inferred TAD boundaries are shown as vertical dotted lines. Blue arrowhead : position of the *Antp-Ubx\_BE* sgRNA.

## 185 **Comparison of 3D conformation and open-chromatin profiles between larval forewings and mid-** 186 **pupal hindwings**

187 The Hi-C dataset analyzed above was prepared from larval forewings, and forewings do not express *Ubx*  
188 (**Fig. 1B**). Next, we repeated our analysis on a Hi-C dataset generated in pupal hindwings instead (van  
189 der Burg et al. 2020), *i.e.* in a later-stage tissue expressing *Ubx*. We found two main differences in this  
190 contact landscape compared to the larval forewing (**Fig. 3**). First, the TAD spanning from *proboscipedia*  
191 (*pb*) to *fushi-tarazu* (*ftz*) faded in intensity, while in contrast, the TAD around *Antp* remained strongly  
192 organized. Second, *Ubx* lost its physical association to the *abd-A* and *Abd-B* domains, and gained a TAD  
193 boundary situated in the *Ubx-AS5'* intron. It is difficult to disentangle effects from staging (larval vs.  
194 pupal) and tissues (forewing vs. hindwing) in this comparison. Specifically, these differences we  
195 observed may be due to chromatin remodeling between stages, as somewhat expected during  
196 metamorphosis (Gutierrez-Perez et al. 2019). Alternatively, it is also possible hindwing development  
197 requires insulate *Ubx* from more posterior enhancers. These issues will require further investigation, for  
198 instance using profiling of histone marks, with pairwise forewing-hindwing comparison at single stages.  
199 Nonetheless the later hindwing sample showed a maintenance of *Antp-Ubx* separation. First, while *Ubx*  
200 formed a smaller TAD spanning its coding exons 1-2, this region conserved a domain of hindwing-  
201 enriched open-chromatin. Second, boundary prediction called two possible, tightly linked TAD limits in  
202 the *Antp-Ubx\_BE* region, showing that the last intron of *Ubx* still acts as an insulating region. In  
203 conclusion, our preliminary comparison of *Hox* 3D conformation indicates that the *Antp-Ubx\_BE* is  
204 relatively stable across two stages and wing serial homologs.

## 205 206 **Mutagenic perturbation of *Antp-Ubx\_BE* results in forewing homeosis**

207 Next, we reasoned that the forewing-enriched ATAC-seq peak present in the inferred boundary interval  
208 (**Fig. 4A**) might mediate the binding of insulator proteins (Savitsky et al. 2016; Stadler et al. 2017), or  
209 act as a transcriptional silencer (Segert et al. 2021). Several genomic features support the former  
210 hypothesis. First, the only forewing-enriched ATAC-seq peak across a 150-kb region (spanning the *Ubx*  
211 gene and the *Antp-Ubx* intergenic region), coincides with the midpoint between the two tentative  
212 *hicFindTADs* boundary predictions inferred from HiC data (**Fig. 2B**). Second, during motif scans  
213 conducted across that 150-kb region we found 8 predicted binding-sites for the *Drosophila* CCCTC-  
214 Binding Factor (CTCF) clustered in a 5-kb region around the differentially accessible region, and none  
215 elsewhere in the last *Ubx* intron (**Fig. 4A**), suggesting the forewing-enriched ATAC-seq peak may  
216 function as a transcriptional insulator (Gambetta and Furlong 2018; Postika et al. 2018; Kyrchanova et  
217 al. 2020; Kaushal et al. 2022). Last, the two candidate CTCF binding motifs that are within the forewing-  
218 enriched ATAC-seq peak are also conserved across Lepidoptera and Trichoptera (**Fig. S1**), two lineages  
219 that diverged around 300 Mya (Kawahara et al. 2019; Thomas et al. 2020).

220 To test this hypothesis, we used CRISPR targeted mutagenesis to perturb *Antp-Ubx\_BE* and  
221 assess its functionality, and designed a single sgRNA in a conserved sequence within the forewing-  
222 enriched ATAC-seq (**Fig. S1**). Remarkably, CRISPR mutagenesis of the *Antp-Ubx\_BE* target induced *G<sub>0</sub>*  
223 mutants with homeotic transformations of their forewings into hindwings (**Figs. 4B-C and S2**),  
224 including identity shifts in patterns, venation, and wing shape. It is important to note that none of the  
225 resulting crispants showed hindwing effects. Thus, we can reasonably attribute forewing homeotic  
226 phenotypes to indel mutations restricted to the intronic region, without disruption of the *Ubx* transcript,  
227 as this would result in hindwing phenotypes (Matsuoka and Monteiro 2021; Tendolkar et al. 2021).



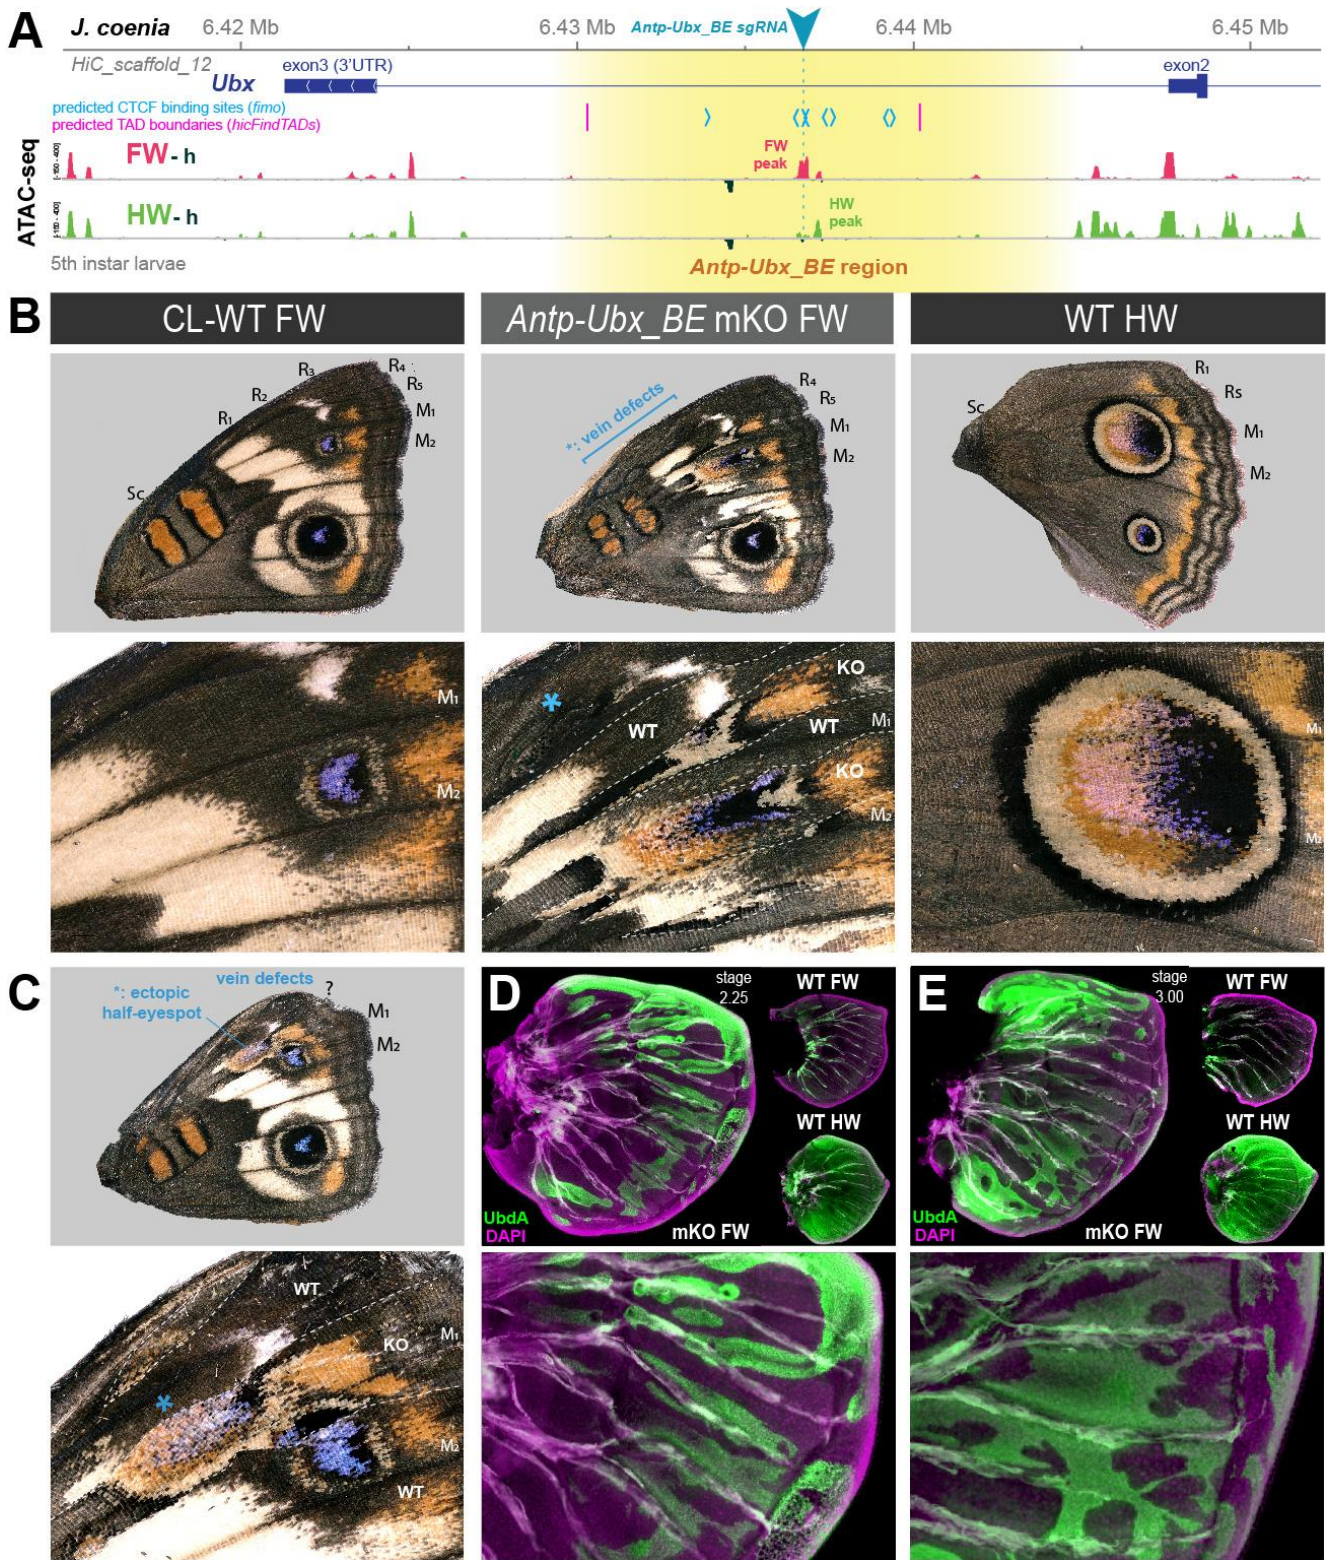

228  
229  
230  
231  
232  
233  
234  
235

**Figure 4. CRISPR perturbation of *Antp-Ubx\_BE* results in FW→HW homeoses.** (A) *Antp-Ubx\_BE* sgRNA targeting (cyan triangle) of a FW-enriched ATAC-peak (magenta) within the *Ubx* last intron. (B-C) Two examples of *J. coenia* *Antp-Ubx\_BE* crispants showing mosaic FW→HW homeoses, shown in dorsal views. CL-WT : contralateral, horizontally flipped images of forewings from the same individuals. WT HW : wild type hindwings from the same individual and mutant forewing side. Both individuals show disruption of their Radial veins (R1-R5 area). The specimen shown in C displays a partial, ectopic eyespot (asterisk). (D-E) Immunofluorescent detection of the UbdA epitope (green) in fifth instar wings disks of *Antp-Ubx\_BE* crispants, revealing ectopic antigenicity in forewings. WT forewings of similar stage, and HW from the same crispant individuals, are shown for comparison as insets. Green autofluorescence was observed in tracheal tissues.



236 Homeotic clones are first visible in *Antp-Ubx\_BE* crispants at the pupal stage, with streaks of  
237 thinner cuticle, sometimes associated with local necrosis or with suture defects in the ventral midline, in  
238 particular where leg and wing pouches adjoin (**Fig. S3**). Color pattern homeotic clones were salient at  
239 the adult stage, with for example, clonal losses of the forewing specific white-band, and partial  
240 acquisitions of the large M<sub>1</sub>-M<sub>2</sub> hindwing eyespot. In one specimen, an ectopic, partial M<sub>1</sub>-M<sub>2</sub> hindwing  
241 eyespot appeared in the R<sub>5</sub>-M<sub>1</sub> region, suggesting a perturbation of the eyespot induction process in  
242 this wing. Nymphalid forewings have five radial veins (R<sub>1-5</sub>), which provide sturdiness for flight (Wootton  
243 1993), while hindwings have only two Radial veins. Forewing homeotic mutants showed mosaic venation  
244 defects in the Radial vein area (**Fig. 4B**). Finally, higher expressivity mutant forewings were smaller and  
245 rounder, reminiscent of hindwing shape.

246 Next, we dissected fifth instar larval wing disks from developing *Antp-Ubx\_BE* crispants, and  
247 monitored the expression of Ubd-A (Ubx and Abd-A epitopes), normally restricted to the hindwing and  
248 only present in the forewing peripodial membrane (Weatherbee et al. 1999). Crispants showed forewing  
249 clones with strong ectopic expression of Ubd-A (**Figs. 4D-E and S4**). This result supports the inference  
250 that *Antp-Ubx\_BE* forewing homeoses are due to the de-repression of *Ubx* in this tissue.

### 251 252 **Mutational interrogation of lncRNA-encoding regions at the *Ubx* locus**

253 We used CRISPR mutagenesis to test the function of the two lncRNA-encoding loci at the *Ubx* locus.  
254 Mutagenesis of the *Ubx-IT1* first exon in *J. coenia*, and of the *Ubx-T1* promoter in *V. cardui*, both  
255 resulted in crispants with small homeotic phenotypes in forewings and hindwings (**Figs. 5 and S5**). This  
256 result contrasts with *Ubx* exon mKO experiments, which only generate hindwing phenotypes (Tendolkar  
257 et al. 2021). Given the scarcity of *Ubx-IT1* crispants obtained (11 out of 236 adults), and the small size of  
258 the homeotic clones within them, we infer the occasional phenotypes may be due to rare alleles. Thus,  
259 rather than evidence of functionality of the *Ubx-IT1* transcript, the homeotic phenotypes may rather  
260 reflect the effects of regulatory perturbation on *Ubx* itself, with some random mutations in this intronic  
261 region resulting in hindwing *Ubx* loss-of-function, and some others triggering derepression in forewings.  
262 Likewise, next we mutagenized the first exon of *Ubx-AS5'*, located upstream of the *Ubx* promoter, and  
263 obtained twelve hindwing mutants and a single forewing mutant (**Fig. 6 and S6**). As with *Ubx-IT1*  
264 CRISPR experiments, these results may be explained by regulatory disruption of *Ubx* transcription, with  
265 a higher ratio of hindwing phenotypes compared to forewings linked to the proximity of the *Ubx*  
266 promoter. Overall, we conclude that the mutational interrogation at these loci can result in dual loss  
267 (hindwing) and gain (forewing) of *Ubx* function effects. Deciphering whether or when these effects  
268 affected *Ubx* expression via local *cis*-regulatory modules, impairment of lncRNA transcripts, or larger  
269 indels overlapping with *Ubx* exons, will require further study (see Discussion).

270  
271

**Table 1. CRISPR mutational interrogation experiments at putative *Ubx* regulatory regions**

| Species          | sgRNA(s)                   | Inj. Embryos<br>Ninj | L1 larvae<br>Nhat | Pupae or<br>L5 larvae | Adults<br>Nadu | Crispants<br>Nmut | Inj. time<br>h AEL | Cas9:sgRNA<br>ng/μL | Hatching<br>Rate<br>Nhat/Ninj | Crispant Rate<br>Nmut/Ninj |
|------------------|----------------------------|----------------------|-------------------|-----------------------|----------------|-------------------|--------------------|---------------------|-------------------------------|----------------------------|
| <i>J. coenia</i> | <i>Antp-Ubx_BE</i>         | 59                   | 50                | 50                    | 44             | 6                 | 2.5-3.5            | 500 : 250           | 84.7%                         | 10.2%                      |
|                  |                            | 118                  | 40                | 40                    | 31             | 6                 | 1.75-2.75          | 250 : 125           | 33.9%                         | 5.1%                       |
|                  |                            | 89                   | 44                | 44                    | 39 *           | 17                | 2.25-3.5           | 500 : 250           | 49.4%                         | 19.1%                      |
|                  | <b>Total</b>               | <b>266</b>           | <b>90</b>         | <b>134</b>            | <b>115</b>     | <b>29</b>         |                    |                     | <b>33.8%</b>                  | <b>10.9%</b>               |
| <i>V. cardui</i> | <i>IT1_sgRNA1</i>          | 204                  | 67                | 50                    | 50             | 2                 | 1-3                | 250 : 125           | 32.8%                         | 1.0%                       |
|                  |                            | 108                  | 49                | 31                    | 31             | 3                 | 2-3                | 125 : 62.5          | 45.4%                         | 2.8%                       |
|                  |                            | 145                  | 60                | 39                    | 39             | 2                 | 2.25-3.5           | 500 : 250           | 41.4%                         | 1.4%                       |
|                  | <b>Total</b>               | <b>457</b>           | <b>176</b>        | <b>120</b>            | <b>120</b>     | <b>7</b>          |                    |                     | <b>38.5%</b>                  | <b>1.5%</b>                |
| <i>J. coenia</i> | <i>IT1_sgRNA2</i>          | 59                   | 40                | 7                     | 6              | 0                 | 0.5-2.5            | 500 : 250           | 67.8%                         | 0.0%                       |
|                  |                            | 124                  | 112               | 112                   | 110            | 4                 | 2.25-4.75          | 500 : 250           | 90.3%                         | 3.2%                       |
|                  | <b>Total</b>               | <b>183</b>           | <b>152</b>        | <b>119</b>            | <b>116</b>     | <b>4</b>          |                    |                     | <b>83.1%</b>                  | <b>2.2%</b>                |
| <i>V. cardui</i> | <i>AS5_sgRNA1</i>          | 334                  | 183               | 57                    | 52             | 5                 | 2-3                | 250 : 125           | 54.8%                         | 1.5%                       |
|                  |                            | 122                  | 87                | 2                     | 2              | 0                 | 2-4                | 500 : 250           | 71.3%                         | 0.0%                       |
|                  | <b>Total</b>               | <b>456</b>           | <b>270</b>        | <b>59</b>             | <b>54</b>      | <b>5</b>          |                    |                     | <b>59.2%</b>                  | <b>1.1%</b>                |
| <i>J. coenia</i> | <i>AS5_sgRNA1</i>          | <b>309</b>           | <b>181</b>        | <b>181</b>            | <b>181</b>     | <b>8</b>          | 2-4.5              | 500 : 250           | <b>58.6%</b>                  | <b>2.6%</b>                |
| <i>J. coenia</i> | <i>Ubx11a2+3<br/>+c5+6</i> | 317                  | 18                | -                     | -              | 2                 | 1-3                | 500 : 75 ea.        | 5.7%                          | 0.6%                       |
|                  |                            | 203                  | 35                | 0                     | 0              | 0                 | 1.5-3.5            | 500 : 75 ea.        | 17.2%                         | 0.0%                       |
|                  | <b>Total</b>               | <b>520</b>           | <b>53</b>         | <b>-</b>              | <b>-</b>       | <b>2</b>          |                    |                     | <b>10.2%</b>                  | <b>0.4%</b>                |
| <i>V. cardui</i> | <i>Ubx11a2+c5</i>          | 50                   | 5                 | 3                     | 3              | 2                 | 4-4.5              | 500 : 500           | 10.0%                         | 4.0%                       |
|                  |                            | 151                  | 29                | 6                     | 5              | 2                 | 2-2.75             | 500 : 125:125       | 19.2%                         | 1.3%                       |
|                  |                            | 361                  | 18                | 13                    | 16             | 6                 | 0.5-2              | 500 : 125:125       | 5.0%                          | 1.7%                       |
|                  | <b>Total</b>               | <b>562</b>           | <b>52</b>         | <b>22</b>             | <b>24</b>      | <b>10</b>         |                    |                     | <b>9.3%</b>                   | <b>1.8%</b>                |
| <i>V. cardui</i> | <i>Ubx11c5</i>             | 168                  | 99                | 27                    | 26             | 3                 | 3.75-4.75          | 250 : 125           | 58.9%                         | 1.8%                       |
|                  |                            | 62                   | 22                | 9                     | 9              | 2                 | 0.5-0.75           | 500 : 250           | 35.5%                         | 3.2%                       |
|                  |                            | 131                  | 93                | 8                     | 8              | 3                 | 1.5-3              | 500 : 250           | 71.0%                         | 2.3%                       |
|                  |                            | 114                  | 63                | 20                    | 20             | 6                 | 3.5-4.5            | 500 : 250           | 55.3%                         | 5.3%                       |
|                  | <b>Total</b>               | <b>475</b>           | <b>277</b>        | <b>64</b>             | <b>63</b>      | <b>14</b>         |                    |                     | <b>58.3%</b>                  | <b>2.9%</b>                |
| <i>V. cardui</i> | <i>Ubx11b9</i>             | 32                   | 18                | 6                     | 5              | 1                 | 1.25-2.25          | 500 : 250           | 56.3%                         | 3.1%                       |
|                  |                            | 63                   | 49                | 9                     | 6              | 1                 | 3.5-4.5            | 500 : 250           | 77.8%                         | 1.6%                       |
|                  | <b>Total</b>               | <b>95</b>            | <b>67</b>         | <b>15</b>             | <b>11</b>      | <b>2</b>          |                    |                     | <b>70.5%</b>                  | <b>2.1%</b>                |
| <i>J. coenia</i> | <i>Ubx11b9</i>             | 41                   | 13                | 13                    | 13             | 3                 | 2.5-4              | 125 : 62.5          | 31.7%                         | 7.3%                       |
|                  |                            | 48                   | 21                | 14                    | 14             | 1                 | 2-3                | 250 : 125           | 43.8%                         | 2.1%                       |
|                  | <b>Total</b>               | <b>89</b>            | <b>34</b>         | <b>27</b>             | <b>27</b>      | <b>4</b>          |                    |                     | <b>38.2%</b>                  | <b>4.5%</b>                |

\* : upper estimate, includes 16 fifth instar larvae that were dissected for immunostainings, of which 7 were mutants (FW UbdA+), and 3 dissected mutant pupae.

272  
273  
274  
275  
276  
277

**Figure 5. Rare, dual homeoses obtained from CRISPR mutagenesis of the *lncRNA\_Ubx-IT1 5'* region. (A) Genomic context of the sgRNA targets (here shown in *J. coenia*), in the promoter and first exon of the non-coding *Ubx-IT1* transcript. (B-C) Dorsal and ventral views of a *J. coenia* crispant displaying dual homeoses, i.e. with both FW→HW (presumably due to *Ubx* gain-of-expression), and HW→FW clones (akin to *Ubx* null mutations). Insets on the right describe forewing mutant clones (*IT1 mKO*), in apposition to CL-WT (contralateral forewings from the same individual), and WT HW (wild type hindwings from the same individual and mutant forewing side). (D) Examples of dual homeoses obtained when targeting orthologous sites in *V. cardui*.**

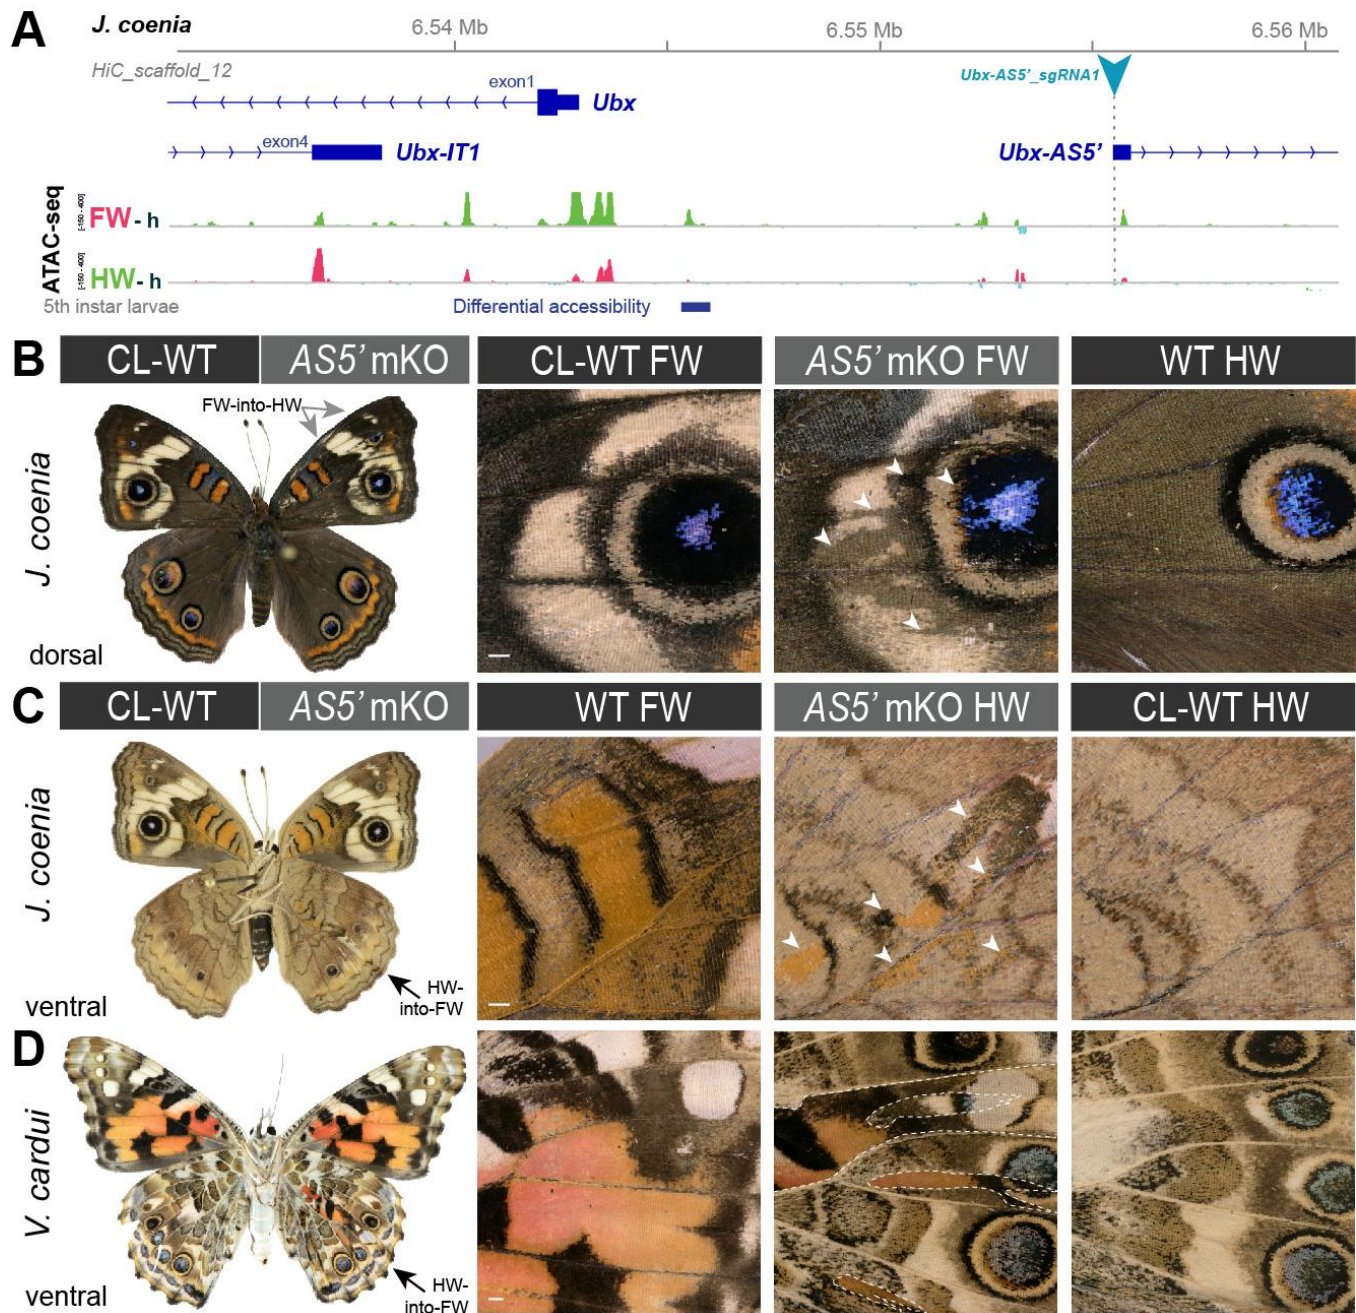

278 **Figure 6. Homeoses obtained from CRISPR mutagenesis of the lncRNA *Ubx-AS5'* first exon.** (A) CRISPR sgRNA targets (here shown in  
 279 *J. coenia*), in the first exon of the non-coding *Ubx-AS5'* transcript. (B) A single *J. coenia* crispant showed a FW→HW transformation. Insets on  
 280 the right describe forewing mutant clones (*AS5' mKO*), in apposition to CL-WT (contralateral forewings from the same individual), and WT HW  
 281 (wild-type hindwings from the same individual and mutant forewing side). (C-D) Examples of HW→FW homeoses obtained in *J. coenia* or when  
 282 targeting orthologous sites in *V. cardui*. Scale bars: 500  $\mu$ m.  
 283

#### 284 **Dual effects of mutagenesis in a putative *Ubx* cis-regulatory module**

285 In an attempt to probe for *Ubx* hindwing-specific regulatory sequences, we focused on a ~ 25kb region  
 286 in the first intron of *Ubx* that displays an ATAC-seq signature of hindwing enrichment in open-  
 287 chromatin relative to forewings, hereafter dubbed *CRM11* (Fig. 7A). We sub-divided this differentially  
 288 accessible region into four peaks (*11a, b, c* and *d*). Targeting the ATAC-seq peaks with multiple sgRNAs  
 289 spanning sub-domains *11a* and *11c* (*UbxCRE11a2c5* in *V. cardui*, *11a2a3c5c6* in *J. coenia*), or with a



290 single target in *11c* (*UbxCRE11c5* in *V. cardui*) yielded dual homeoses : FW→HW and HW→FW (**Figs. 7B-**  
291 **D and S7**). Hindwing effects were reminiscent of *Ubx* protein coding knockouts (Tendolkar et al. 2021),  
292 indicating that these crispant alleles with a hindwing phenotype produce *Ubx* loss-of-function effects.  
293 Individuals with hindwing clones 2.75 times more common than individuals with forewings in this  
294 dataset. Similarly to the lncRNA loci perturbation experiments, dual homeoses may indicate the  
295 presence of hindwing activators and forewing repressors in the *CRM11* region, with various CRISPR  
296 alleles producing a spectrum of indels and effects (see Discussion). It is noteworthy that while single-  
297 target experiments showed little lethality (55% hatching rate), dual or quadruple injection mixes  
298 resulted in low hatching rates of injected embryos (~ 10%). Multiple targeting thus appears to induce  
299 high-rates of embryonic lethality, possibly due to chromosomal damage (Culot et al. 2019; Zuccaro et  
300 al. 2020). Dual targeting with *a2+c5* also yielded partial HW→FW homeoses in *V. cardui* under the form  
301 of ectopic white eyespot foci phenotypes (**Fig. 7E**), as occasionally observed in *Ubx* null crispants  
302 (Tendolkar et al. 2021), seemingly due to hypomorphic or heterozygous allelic states.

303 Next, we focused on a single target shared between both *V. cardui* and *J. coenia* in the *11b* sub-  
304 domain. A whole genome alignment between 23 lepidopteran species and 2 trichopteran species  
305 indicated that region *11b* is deeply conserved, suggesting important functional constraints on its  
306 sequence (**Fig. S8A-B**). Mutagenesis of *11b* yielded a relatively high hatching rate (mean = 51.8 %),  
307 indicating a rare occurrence of the deleterious mutational effects observed in multiple targeting (see  
308 above). Four *J. coenia* crispants and two *V. cardui* crispants were obtained, all exclusively showing  
309 hindwing phenotype devoid of forewing effects. HW→FW homeoses included a variety of phenotypes all  
310 seen in *Ubx* CDS mutants (Tendolkar et al. 2021), including transformations of the orange Discalis  
311 elements and the white band in *J. coenia*, and partial shifts in eyespot identity (**Fig. S8C**). Together the  
312 consistency in direction of transformations and the deep conservation of the *11b* region suggests it may  
313 encode an enhancer necessary for the transcriptional activation of *Ubx* in hindwings.

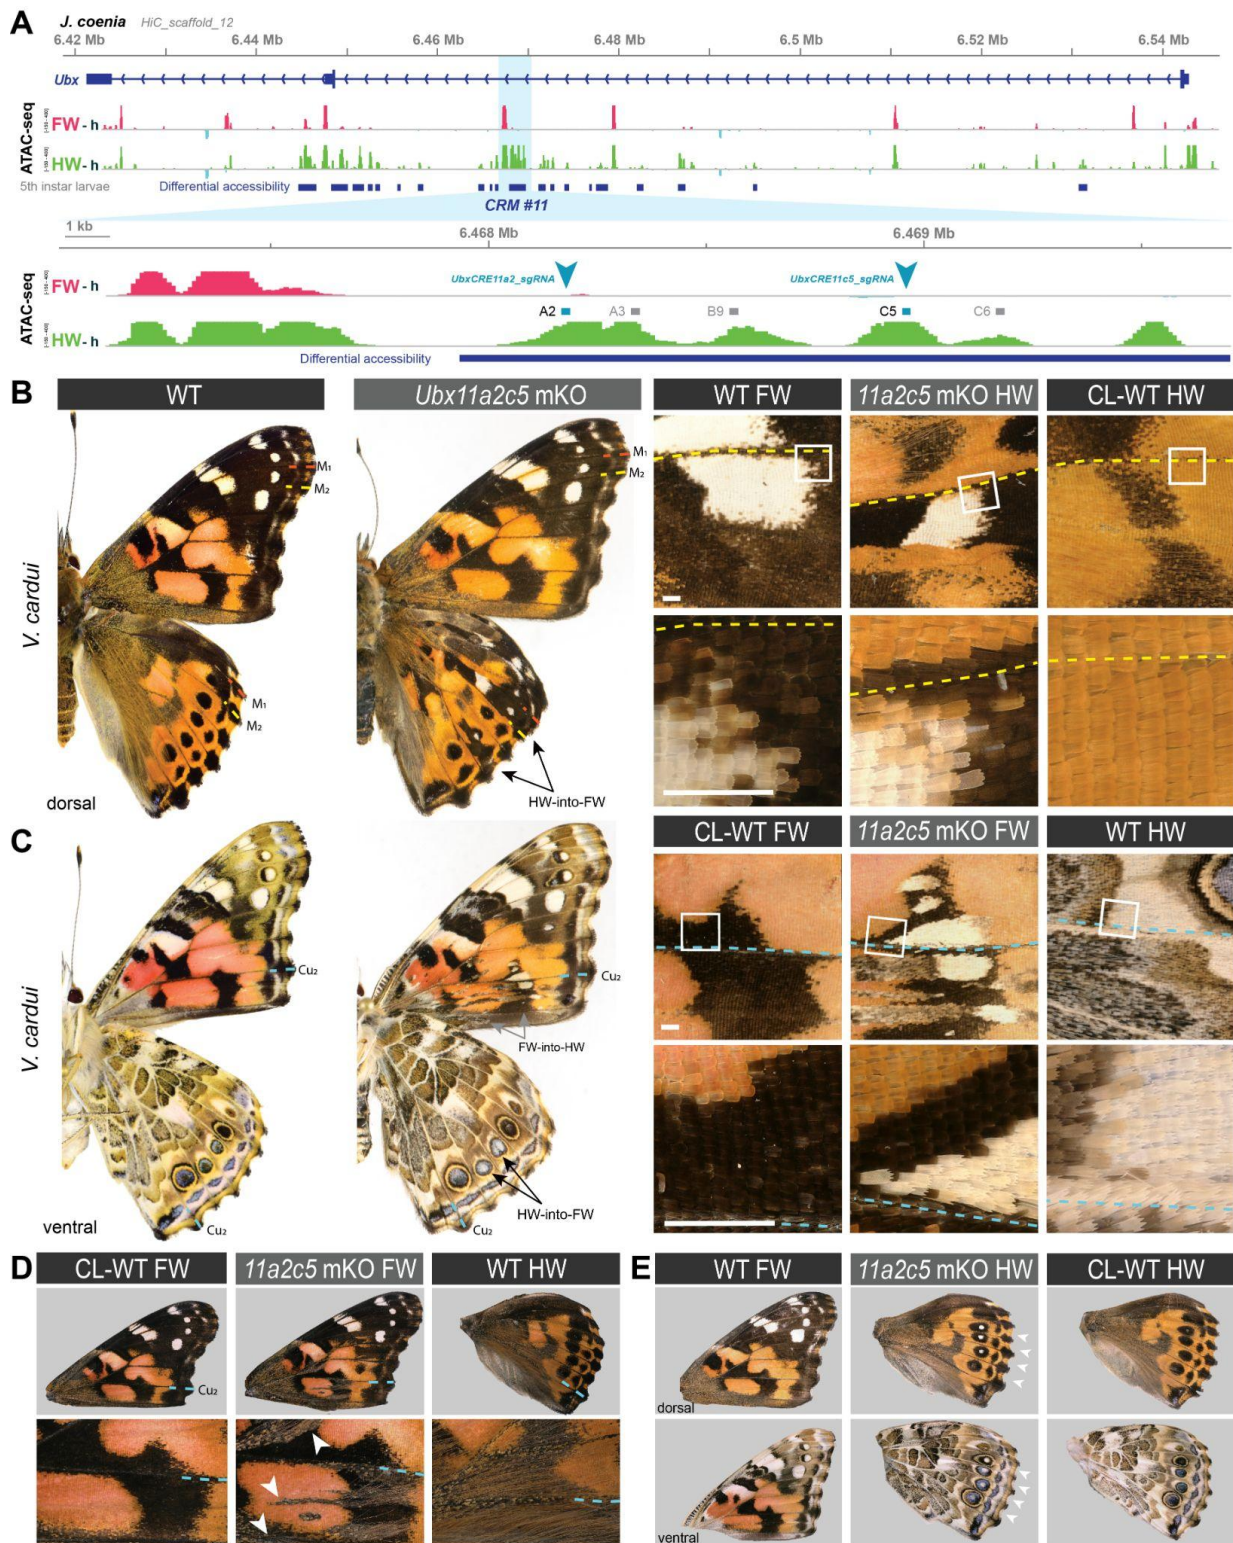

314

315

316

317

318

319

320

**Figure 7. CRISPR perturbation of *Ubx CRM11* generates occasional dual homeotic phenotypes.** (A) Overview of ATAC-seq differential chromatin accessibility profiles (hindwing - head tissues, green ; forewing - head tissue, magenta) across the *Ubx* first exon. Several regions show differential opening between wings, one of which (*CRM11*), was targeted here for CRISPR perturbation (sites *a2* and *c5* indicate sgRNA targets). (B) Dual homeosis phenotypes obtained in *V. cardui* following dual-targeting of *UbxCRE11a2c5*, including homeoses in color patterns and scale morphology. (D) Additional example of a *V. cardui UbxCRE11a2c5* crispant with a forewing phenotype (gain of hindwing hair patches, arrowheads). (E) Example of mild hindwing homeoses showing a white eyespot focus on the dorsal and ventral sides. These effects were

321 previously shown to occur in coding *Ubx* CRISPR knock-out experiments (Tendolkar et al, 2021). Contralateral (CL) WT wings are shown for  
322 comparison with mutant wings (B-E). Colored dashed lines: wing veins. Scale bars: 500  $\mu$ m.

### 323 **A sample of spontaneous homeotic mutants in *Heliconius* butterflies**

324 Homeotic shifts between forewings and hindwings can occur naturally in Lepidoptera, and have been  
325 documented as pattern aberrations in museum specimens (Sibatani 1980, 1983). As a complement to  
326 CRISPR-induced homeoses, we document here a rich sample of forewing/hindwing homeotic mutants  
327 in the genus *Heliconius*, systematically collected by L. E. Gilbert between 1987 and 2016 in captive  
328 stocks at UT Austin, as well as in the wild. Across these 15 spontaneous mutants, 12 show HW $\rightarrow$ FW  
329 clones (**Fig. S9**), against 3 specimens with FW $\rightarrow$ HW effects (**Fig. 8**). Mutant clones in this dataset were  
330 always posterior to the M<sub>2</sub> vein. Only 2 mosaic phenotypes were found on a dorsal side, with the 13  
331 others appearing ventrally. These homeotic mosaics show pattern shifts with complete fore/hindwing  
332 conversions of scale types, as seen for instance in the loss of gray wing coupling scales on posterior  
333 ventral forewings (**Fig. 8A-B**), or conversely, in their acquisition in posterior hindwings (arrowheads in  
334 **Fig. S9B-D, H**). Homeoses also include noticeable local changes in wing shape, particularly in  
335 hindwings (asterisks in **Fig. S9**). Taken together, these effects are akin to CRISPR-induced  
336 perturbations at the *Ubx* locus. We speculate that fore/hindwing homeotic aberrations, found in nature  
337 and captive stocks, result from mutations at the *Ubx* locus itself.



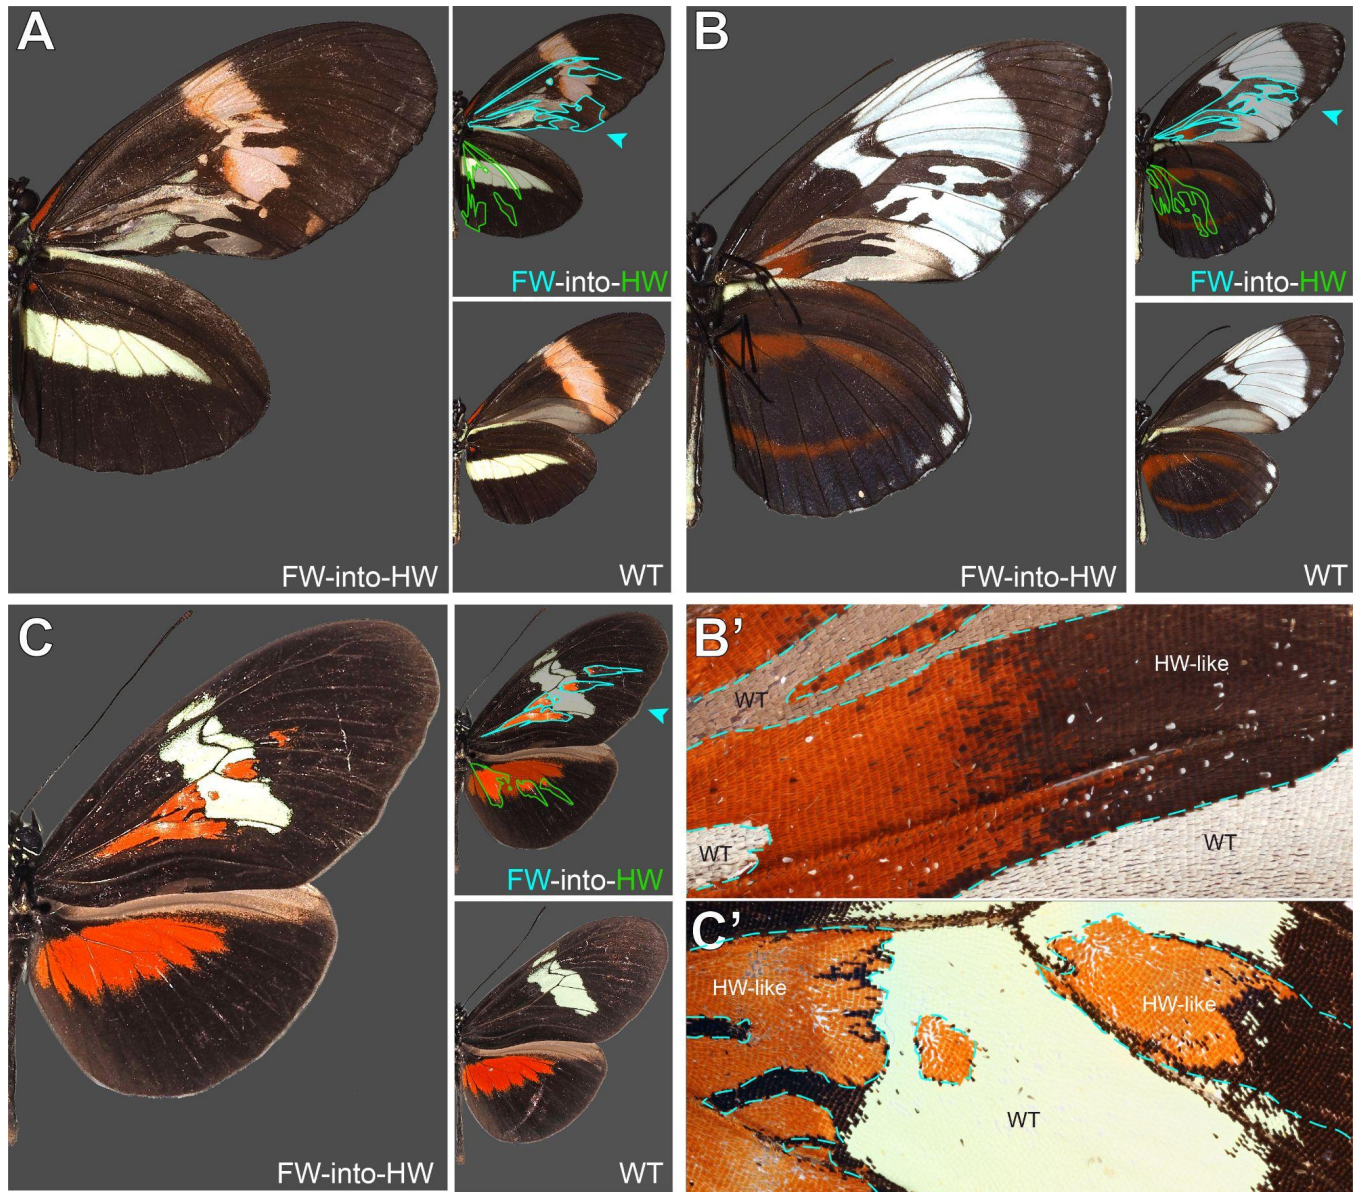

338  
339  
340  
341  
342  
343

**Figure 8. Mosaic forewing homeoses in *Heliconius* butterfly spontaneous mutants.** Wild-type and mutant sides from the same individuals are shown in each panel, with one side digitally flipped to match left-to-right orientation. **A.** *Heliconius melpomene rosina*, ventral view. Wild-caught in the Osa Peninsula (Costa Rica), October 1989. **B.** *Heliconius cydno galanthus*, ventral view (magnified inset in **B'**). Stock culture from Organisation for Tropical Studies station, La Selva (Costa Rica), June 1990. **C.** *Heliconius himera*, dorsal view (magnified inset in **C'**). Stock Culture in the butterfly farm Heliconius Butterfly Works in Mindo (Ecuador), March 2008.

344  
345

## DISCUSSION

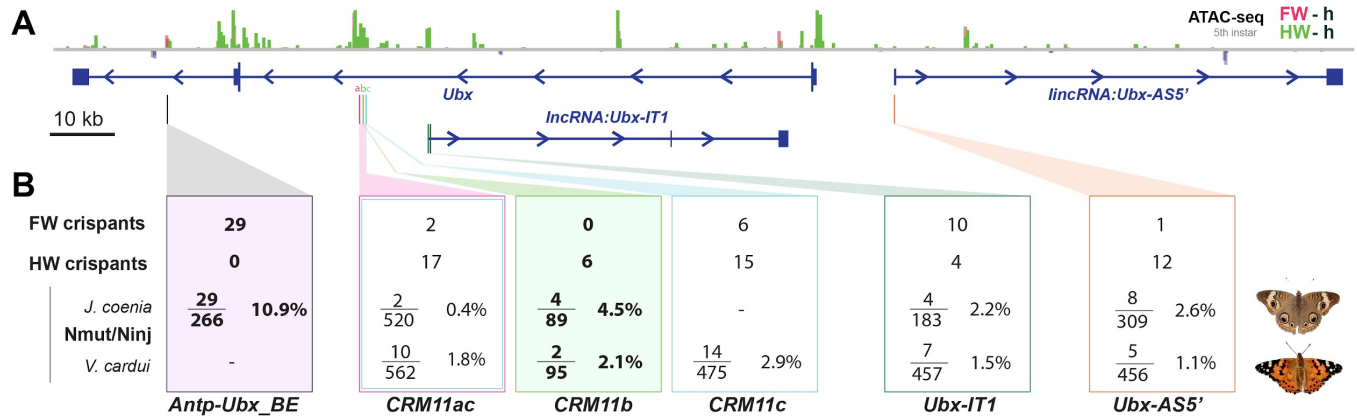

346  
347  
348  
349  
350  
351  
352

**Figure 9. Summary of wing homeosis phenotypes obtained from mutational interrogation. (A)** CRISPR targets at non-coding regions across the *Ubx* region, here visualized in *J. coenia*. **(B)** Summary of injection and adult phenotype data obtained across CRISPR experiments. FW/HW crispants : total number of individuals with forewing or hindwing homeotic clones, regardless of the injected species. Individuals with dual homeosis are counted in both categories. N<sub>mut</sub>/N<sub>inj</sub> : number of crispants obtained (N<sub>mut</sub>), over the number of injected embryos for each species. Bold: experiments with consistent effects in only one segment. See **Table 1** for details.

### An intronic region with ATAC-seq hindwing-enrichment regulates *Ubx*

353 All CRISPR targets yielded homeotic phenotypes (**Fig. 9**), with two kinds of interference with *Ubx*  
354 expression – forewing gain-of-function effects, and hindwing loss-of-function effects – and indicating  
355 the presence of regulatory sequences (broadly defined), that repress or enhance *Ubx* expression in this  
356 region. It is crucial here to highlight the limitations of the method, in order to derive proper insights  
357 about the functionality of the regulatory regions we tested. In essence, butterfly CRISPR experiments  
358 generate random mutations by non-homologous end joining repair, that are usually deletions (Connahs  
359 et al. 2019; Mazo-Vargas et al. 2022; Van Belleghem et al. 2023), and they require genotyping in a  
360 second (G<sub>1</sub>) generation to be properly matched to a phenotype (genotyping G<sub>0</sub> mosaic wings is limited,  
361 because adult wings lost scale building cells that underlie a given phenotype). Previous data from other  
362 organisms suggests that Cas9 nuclease targeting can generate larger than expected mutations that  
363 evade common genotyping techniques (Shin et al. 2017; Adikusuma et al. 2018; Kosicki et al. 2018;  
364 Cullot et al. 2019; Owens et al. 2019). Even under the assumption that such mutations are relatively rare  
365 in butterfly embryos, the fact we injected >100 embryos in each experiment makes their occurrence  
366 likely (**Fig. 9**).

368 When targeting hindwing-enriched ATAC-seq peaks within the first intron of *Ubx* – from *CRM11*  
369 to the hindwing-enriched open-chromatin peak that coincides with the first exon of *Ubx-IT1* – we  
370 obtained a mixture of hindwing and forewing phenotypes. Given the potential heterogeneity of allele  
371 sizes in these experiments, it is difficult to conclude robustly about the function of individual targets.  
372 Nonetheless, the phenotypic data and in particular the obtention of dual homeoses suggest we  
373 disrupted sequences that are necessary to *Ubx* activation in hindwings, as well as to its repression in  
374 forewings. Bifunctional *cis*-regulatory elements that can switch between enhancer and silencer roles are  
375 prevalent in *Drosophila* (Gisselbrecht et al. 2020; Segert et al. 2021; Pang et al. 2022). The *CRM11* and  
376 *IT1* targets adjoin or overlap with open-chromatin signals in both wing sets (**Figs. 5A and 7A**),  
377 providing circumstantial evidence that these regions might serve as bifunctional elements. Similar  
378 observations were recently made in mutational interrogation experiments of the butterfly *WntA*  
379 patterning gene (Mazo-Vargas et al. 2022). Alternatively, silencers and enhancers may be tightly linked  
380 and interact in close proximity to shape gene expression (Méndez-González et al. 2023), implying in our

381 case that forewing and hindwing phenotypes are mediated by alleles spanning adjacent but distinct  
382 elements. A formal test of these mechanisms would require germline transmission and genotyping of  
383 these alleles, which was unsuccessful in our attempts at crossing *Ubx cis*-regulatory crispants.

384 In contrast with the dual effects obtained when targeting *CRM11a+c* (**Fig. 9**), *CRM11b*  
385 perturbation resulted in hindwing-limited effects, and may suggest that an *Ubx* enhancer was  
386 consistently compromised in this specific dataset. The high lethality and small size of mutant wing  
387 streaks suggest that only individuals with sparse, small mutant mitotic clones can survive to the adult  
388 stage. If this is true, *CRM11* may contain pleiotropic enhancers that are vital for normal *Ubx* function at  
389 earlier stages, but expression-reporter studies will be required to test this.

390

### 391 **Parsing lncRNA-encoding regions – correlation or cause?**

392 LncRNAs are emerging as important regulators of gene expression and developmental processes  
393 (Zhang et al. 2019; Statello et al. 2021). *IT1* targeting generated a majority of forewing phenotypes,  
394 suggesting perturbation of *Ubx* repression in the T2 segment. However, *IT1* showed low expression in  
395 forewing RNAseq datasets from *K. inachus*, and higher expression in the hindwing (**Fig. 1B**), a pattern  
396 inconsistent with a repressive role of the antisense *IT1* transcript on *Ubx* expression. It is generally  
397 challenging to disentangle the effects of transcription of a non-coding element from the potential  
398 effects of adjacent enhancers (Natoli and Andrau 2012; Pease et al. 2013). Therefore, an alternative  
399 explanation would be that the phenotypes are confounded by the overlap and proximity to open-  
400 chromatin regions, which may play *cis*-regulatory roles on *Ubx* via DNA-protein interactions, rather than  
401 via the lncRNA. If this is the case, it is possible that the targeted *Ubx-IT1* site, which yielded homeoses  
402 in both directions and bears both forewing and hindwing open-chromatin, is a bifunctional *cis*-  
403 regulatory element that can shift regulatory activities between these tissues (Gisselbrecht et al. 2020).  
404 Targeted mutagenesis of the *Ubx-AS5'* first exon mainly generated hindwing phenotypes, although with  
405 a relatively low-efficiency. Because this target is about 10 kb away from the *Ubx* promoter itself, it is  
406 plausible that the observed phenotypes were due to large deletions reaching the promoter region of  
407 *Ubx*. Because mutational interrogation alone cannot discern if phenotypic effects arose from regulatory  
408 failure at the chromatin or transcript level, determining if *AS5'* and *IT1* are functional lncRNAs will need  
409 further examination.

410

### 411 **A TAD boundary element likely acts as an insulator preventing *Ubx* forewing expression**

412 Tight maintenance of TAD boundaries at the *Hox* locus is crucial for accurate segment identity and is  
413 facilitated by insulator proteins (Stadler et al. 2017; Gambetta and Furlong 2018; Ramírez et al. 2018).  
414 The *Antp-Ubx\_BE* element we targeted is in a good position to block interactions between *Antp* and *Ubx*  
415 (**Figs. 2-3**). Consistent with this idea, the last intron of *Ubx* contains 8 CTCF binding motifs that are all  
416 clustered within 5-kb around the forewing-enriched ATAC peak, including two sites at highly conserved  
417 positions that are only 100-bp away from the CRISPR target (**Fig. S1**). CTCF sites prevent cross-talk  
418 between regulatory domains in the fly BX-C complex, and result in *Hox* misexpression when deleted  
419 (Postika et al. 2018; Kyrchanova et al. 2020; Kaushal et al. 2022; Kahn et al. 2023). Thus, the density of  
420 CTCF sites in this region may be indicative of a *bona fide* insulator active in forewings.

421 CRISPR mutagenesis of *Antp-Ubx\_BE* generated FW→HW homeoses associated with a gain of  
422 UbdA antigenicity in forewings, with no effects in the other direction, in stark contrast with other targets  
423 (**Fig. 9B**). This suggests a possible de-insulation of the TAD boundary in the crispant clones, resulting in  
424 a TAD fusion or in a long-range interaction between a T2-specific enhancer and *Ubx* promoter. Similar



425 de-insulating effects of deletion alleles have been described at the *Notch* locus in *Drosophila* (Arzate-  
426 Mejía et al. 2020), in digit-patterning mutants in mice and humans (Lupiáñez et al. 2015; Anania et al.  
427 2022), or at murine and fly *Hox* loci depleted of CTCF-mediated regulatory blocking (Narendra et al.  
428 2015; Gambetta and Furlong 2018; Kyrchanova et al. 2020). It will be interesting to profile the binding  
429 of insulator proteins and transcriptional repressors across the butterfly *Hox* TAD landscape to shed  
430 more light onto the mechanisms of *Ubx* insulation, using *in vivo* assays (Bowman et al. 2014), or *in silico*  
431 predictions that take advantage of updated binding matrices for insect insulator proteins (Mitra et al.  
432 2018). Of note, our CRISPR target is adjacent to an hindwing-enriched peak that also presented CTCF  
433 binding sites (**Fig. 4A**). Following a similar logic, this site could be a candidate insulator specific to  
434 *Ubx*-expressing tissues like the hindwing, a hypothesis that will require further testing.

435  
436

### 437 **Making sense of spontaneous wing homeotic mutants**

438 In this article, we documented a large sample of spontaneous homeotic mutants obtained in *Heliconius*  
439 *spp.* All homeotic clones were limited to the wing posterior compartments (*ie.* posterior to the  $M_2$  vein),  
440 possibly because of parasegmental, compartment-specific regulatory domains that played historic roles  
441 in the study of *Drosophila* BX-C regulation (Maeda and Karch 2015). Sibatani documented in  
442 Lepidoptera that “*the mosaics of F/H homeosis tend to occur most frequently in the posterior half of*  
443 *the wing, the boundary of the anterior and posterior halves occurring somewhere in space  $M_1$ - $M_2$* ”  
444 (Sibatani 1983). Our collection of spontaneous *Heliconius* mutants only displayed clones in posterior  
445 regions, consistently with this trend. However, our CRISPR perturbation assays of *J. coenia* and *V. cardui*  
446 *cis*-regulatory regions also generated anterior clones, with all targets. Deciphering how butterfly *Ubx*  
447 regulation is compartmentized between parasegmental or wing antero-posterior domains will require  
448 additional investigation. Most *Heliconius* homeoses were in the hindwings (*ie.* putative *Ubx* loss-of-  
449 expression clones), and among these, all but one were ventral (**Fig. S9**). Three mutants showed forewing  
450 homeoses (*ie.* putative *Ubx* gain-of-expression clones), two of them ventral and one of them dorsal (**Fig.**  
451 **8**). The systematic reviews of wing homeosis in Lepidoptera found that forewing homeoses are almost  
452 as common as hindwing ones (Sibatani 1980, 1983). Our mutational interrogation assays, while coarse  
453 in nature, revealed the existence of activating and repressing *cis*-regulatory sequences at the *Ubx* locus  
454 itself. Spontaneous FW↔HW homeoses observed in butterflies and moths may thus result from somatic  
455 mutations or transposition events at this locus.

456

## 457 **MATERIALS AND METHODS**

458

### 459 **Genome annotations and transcriptomic analysis**

460 Nymphalid genome sequences of the *Hox* cluster and their annotations were extracted from the NCBI  
461 Assembly and Lepbase online repositories (Challis et al. 2016; Kitts et al. 2016) as follows : *V. cardui*  
462 from NCBI *iVanCard2.1* and LepBase *Vc\_v1* ; *A. (Nymphalis) io* from NCBI *iAglIoxx1.1*; *J. coenia* from  
463 Lepbase *Jc\_v2*; *P. xylostella* from NCBI *iPluXylo3.1*. The *Ubx* regions from *iVanCard2.2*, *Vc\_v1*, and *Jc\_v2*  
464 were manually re-annotated using wing transcriptome data on the NCBI SRA (BioProjects  
465 *PRJNA661999*, *PRJNA293289*, *PRJNA237755*, *PRJNA385867*, and *PRJNA498283*) The genome  
466 sequence of *K. inachus* was obtained from the Dryad repository (Yang et al. 2020). Differential gene  
467 expression analysis across the *K. inachus Ubx* locus were carried out using wing transcriptome data  
468 available on the NCBI SRA (BioProject *PRJNA698433*), following a manual re-annotation of a

469 preliminary gene models provided by Peiwen Yang and Wei Zhang (Wang et al. 2022). All transcripts  
470 analyses were performed using the *STAR* intron-aware aligner and *DESeq2* expression analysis package  
471 as previously described (Love et al. 2014; Dobin and Gingeras 2016; Hanly et al. 2019, 2022). Expression  
472 levels were calculated as genome-wide normalized counts and pairwise Wald tests were performed to  
473 assess differential expression between forewings and hindwings. Multiple test adjustment was  
474 performed using Benjamini and Hochberg correction.

475

### 476 **Hi-C and ATAC-seq analyses**

477 Hi-C data from *J. coenia* fifth instar larval forewings and 48-72 h APF pupa hindwings are available at  
478 the NCBI SRA BioProject *PRJNA641138* (van der Burg et al. 2020). Triplicated ATAC-seq datasets for  
479 larval and pupal wing and head tissues of *J. coenia* and *V. cardui* (van der Burg et al. 2019, 2020; Mazo-  
480 Vargas et al. 2022) are available on the NCBI SRA BioProjects *PRJNA497878*, *PRJNA695303*, and  
481 *PRJNA559165*. All the ATAC-seq and Hi-C data were re-analysed on *J. coenia* and *V. cardui Ubx*  
482 genomic regions as previously described (Mazo-Vargas et al. 2022). Briefly, matrices of interactions  
483 were constructed by mapping paired reads against the *Junonia coenia* genome (Mazo-Vargas et al.,  
484 2022) using *hicBuildMatrix* (Ramírez et al. 2018). Matrices from larvae and pupae were normalized  
485 using *hicNormalize* and corrected with the Knight-Ruiz matrix balancing algorithm. The definitions of  
486 topologically associating domains (TADs) can be influenced by various factors such as the choice of  
487 software, parameters, sequencing depth, and the presence of experimental noise. To ensure reliability, it  
488 is recommended to compare TAD calls with independent datasets, such as histone marks or known  
489 factors associated with TAD boundaries. In the absence of these specific datasets, we employed a  
490 different combination of parameters in the *hicFindTADs* tool and compared the resulting TAD calls. HiC  
491 matrices at 10 kb and 20 kb bin resolutions were utilized, and TAD insulation scores were evaluated  
492 using a false-discovery rate correction for multiple testing, with *p-value* thresholds of 0.01 and 0.005.  
493 Consistent TAD boundary calls with negative TAD separation scores were selected to define domain  
494 limits at 10 kb and 20 kb matrix resolutions.

495

### 496 **CTCF motif binding predictions**

497 The program *fimo* was used to scan for the *J. coenia* candidate TAD boundary region  
498 (HiC\_scaffold\_12:6430000-6444000) for canonical CTCF binding sites, using the positional weight  
499 matrix MA0205.1 deposited in the JASPAR database (Holohan et al. 2007; Cuellar-Partida et al. 2012;  
500 Castro-Mondragon et al. 2022).

501

### 502 **Genomic conservation analyses**

503 We generated whole-genome alignments of 25 Lepidoptera and 2 Trichoptera reference species from  
504 NCBI Assembly using *ProgressiveCactus* (Armstrong et al. 2020), and *HAL tools* (Hickey et al. 2013) for  
505 converting the resulting HAL file to the MAF format. We provided a species topology tree of 23  
506 Lepidoptera species to *PhyloFit* (Hubisz et al. 2011) to fit a multiple sequence alignment on the  
507 reference *J. coenia Ubx* locus, using *HKY85* as the substitution model. Using *PhastCons* (Siepel et al.  
508 2005), we then generated conservation score plots using standard parameters (target-coverage = 0.45;  
509 expected-length = 12; rho = 0.1) stored in BED and WIG file formats.

510

### 511 **Butterfly rearing and CRISPR microinjections**

512 *J. coenia* and *V. cardui* colonies were maintained at 25°C and 60-70% relative humidity in a growth  
513 chamber with a 14:10 light:dark photoperiod. Larval rearing on artificial diets, egg collection, and

514 microinjections followed previously described methods (Martin et al. 2020; Tendolkar et al. 2021).  
515 Cas9:sgRNA heteroduplexes were prepared as previously described (Martin et al., 2020). Frozen  
516 aliquots of Cas9-2xNLS (2.5  $\mu$ L ; 1,000 ng/ $\mu$ L) and sgRNA (2.5  $\mu$ L ; 500 ng/ $\mu$ L) were mixed in 2:1 and  
517 4:1:1 mass ratios for single and dual target injections, respectively. CRISPR sgRNA targets are listed in  
518 **Table S1**.

519

### 520 **Antibody stainings**

521 Fifth instar wing disks were dissected in ice cold Phosphate Buffer Saline (PBS), fixed for 15-20 min at  
522 room temperature in methanol-free formaldehyde diluted to 4% in PBS / 2mM EGTA (egtazic acid),  
523 washed in PBS with 0.1% Triton X-100 (PT), stored in PT with 0.5% Bovine Serum albumin (PT-BSA),  
524 incubated overnight at 4°C in PT-BSA with a 1:5 dilution of the FP6.87 antibody serum (mouse  
525 monoclonal, Developmental Studies Hybridoma Bank), and washed in PT. A 1:250 dilution of anti-Mouse  
526 IgG antibody coupled to AlexaFluor488 or Rabbit AlexaFluor555 was made in PT-BSA and spun down  
527 at 14,000 rcf to remove aggregates, and incubated with wings for 2 h at room temperature, before  
528 additional washes, incubation in 50% glycerol-PBS with DAPI (4',6-diamidino-2-phenylindole) nuclear  
529 stain, and incubation and mounting in 60% glycerol-PBS with 2mM of EDTA  
530 (Ethylenediaminetetraacetic acid).

531

### 532 **Imaging**

533 Full-mount photographs of *J. coenia* and *V. cardui* were taken on a Nikon D5300 digital camera mounted  
534 with an AF-S VR MicroNikkor 105mm f/2.8G lens, with magnified views taken using a Keyence VHX-5000  
535 digital microscope mounted with VH-Z00T and VH-Z100T lenses. Immunofluorescent stainings were  
536 imaged on an Olympus BX53 epifluorescent microscope mounted with UPLFLN 4x/0.13 and 10X/0.3  
537 objectives.

538

### 539 **ACKNOWLEDGEMENTS**

540 We thank Ling Sheng Loh and the undergraduate researchers from the Martin Lab for assistance with  
541 micro-injections and insect rearing, Rachel Canalichio and the GWU Harlan Greenhouse personnel for  
542 growing host plants, Patricia Hernandez for sharing microscopes, and Alex Wild for assistance with  
543 *Heliconius* microphotographs at UT Austin. We wish to acknowledge James Lewis and Bob Reed for  
544 stimulating insights on open-chromatin biology and the *Hox* locus, as well as for generating Hi-C  
545 libraries published in previous publications that we re-analyzed here. This work was supported by the  
546 NSF awards IOS-1656553 and IOS-2110534 to AM, the Wilbur V. Harlan Research Fellowship to AT, the  
547 NSF Postdoctoral Research Fellowship in Biology to AMV, and the Smithsonian Institution Biodiversity  
548 Genomics Fellowship to JJH.



549

## REFERENCES

- 550 Adikusuma F, Piltz S, Corbett MA, et al (2018) Large deletions induced by Cas9 cleavage. *Nature* 560:E8–E9
- 551 Anania C, Acemel RD, Jedamzick J, et al (2022) In vivo dissection of a clustered-CTCF domain boundary reveals
- 552 developmental principles of regulatory insulation. *Nature Genetics* 54:1026–1036
- 553 Armstrong J, Hickey G, Diekhans M, et al (2020) Progressive Cactus is a multiple-genome aligner for the
- 554 thousand-genome era. *Nature* 587:246–251. <https://doi.org/10.1038/s41586-020-2871-y>
- 555 Arzate-Mejía RG, Josué Cerecedo-Castillo A, Guerrero G, et al (2020) In situ dissection of domain boundaries
- 556 affect genome topology and gene transcription in *Drosophila*. *Nature communications* 11:894
- 557 Bowman SK, Deaton AM, Domingues H, et al (2014) H3K27 modifications define segmental regulatory domains
- 558 in the *Drosophila* bithorax complex. *Elife* 3:e02833
- 559 Buffry AD, Kittelmann S, McGregor AP (2023) Characterisation of the role and regulation of Ultrabithorax in
- 560 sculpting fine-scale leg morphology. *Frontiers in Cell and Developmental Biology* 11:
- 561 Castro-Mondragon JA, Riudavets-Puig R, Rauluseviciute I, et al (2022) JASPAR 2022: the 9th release of the
- 562 open-access database of transcription factor binding profiles. *Nucleic acids research* 50:D165–D173
- 563 Challis RJ, Kumar S, Dasmahapatra KKK, et al (2016) Lepbase: the Lepidopteran genome database. *bioRxiv*
- 564 056994
- 565 Connahs H, Tlili S, van Creijl J, et al (2019) Activation of butterfly eyespots by Distal-less is consistent with a
- 566 reaction-diffusion process. *Development* 146:dev169367
- 567 Cuellar-Partida G, Buske FA, McLeay RC, et al (2012) Epigenetic priors for identifying active transcription factor
- 568 binding sites. *Bioinformatics* 28:56–62
- 569 Cullot G, Boutin J, Toutain J, et al (2019) CRISPR-Cas9 genome editing induces megabase-scale chromosomal
- 570 truncations. *Nature communications* 10:1136
- 571 Dobin A, Gingeras TR (2016) Optimizing RNA-Seq mapping with STAR. In: *Data mining techniques for the life*
- 572 *sciences*. Springer, pp 245–262
- 573 Feng S, Rastogi C, Loker R, et al (2022) Transcription factor paralogs orchestrate alternative gene regulatory
- 574 networks by context-dependent cooperation with multiple cofactors. *Nature Communications* 13:1–19
- 575 Ferguson L, Marletaz F, Carter J-M, et al (2014) Ancient expansion of the Hox cluster in Lepidoptera generated
- 576 four homeobox genes implicated in extra-embryonic tissue formation. *PLoS Genet* 10:e1004698
- 577 Gambetta MC, Furlong EE (2018) The insulator protein CTCF is required for correct Hox gene expression, but not
- 578 for embryonic development in *Drosophila*. *Genetics* 210:129–136
- 579 Garaulet DL, Lai EC (2015) Hox miRNA regulation within the *Drosophila* Bithorax complex: Patterning behavior.
- 580 *Mechanisms of development* 138:151–159
- 581 Gaunt SJ (2022) Seeking sense in the Hox gene cluster. *Journal of Developmental Biology* 10:48
- 582 Gisselbrecht SS, Palagi A, Kurland JV, et al (2020) Transcriptional silencers in *Drosophila* serve a dual role as
- 583 transcriptional enhancers in alternate cellular contexts. *Molecular cell* 77:324–337
- 584 Guo Y, Xu Q, Canzio D, et al (2015) CRISPR inversion of CTCF sites alters genome topology and
- 585 enhancer/promoter function. *Cell* 162:900–910
- 586 Gutierrez-Perez I, Rowley MJ, Lyu X, et al (2019) Ecdysone-Induced 3D chromatin reorganization involves active
- 587 enhancers bound by pipsqueak and polycomb. *Cell reports* 28:2715–2727
- 588 Hajirnis N, Mishra RK (2021) Homeotic Genes: Clustering, Modularity, and Diversity. *Frontiers in Cell and*
- 589 *Developmental Biology* 9:
- 590 Hanly JJ, Livraghi L, Heryanto C, et al (2022) A large deletion at the cortex locus eliminates butterfly wing
- 591 patterning. *G3* 12:jkac021
- 592 Hanly JJ, Wallbank RW, McMillan WO, Jiggins CD (2019) Conservation and flexibility in the gene regulatory
- 593 landscape of heliconiine butterfly wings. *Evodevo* 10:1–14
- 594 Heffer A, Pick L (2013) Conservation and variation in Hox genes: how insect models pioneered the evo-devo field.
- 595 *Annu Rev Entomol* 58:161–179
- 596 Hermann A, Kosman D, McGinnis W, Tour E (2022) The expression of *Drosophila melanogaster* Hox gene
- 597 Ultrabithorax is not overtly regulated by the intronic long noncoding RNA lncRNA:PS4 in a wild-type
- 598 genetic background. *G3 Genes|Genomes|Genetics* 12:jkab374. <https://doi.org/10.1093/g3journal/jkab374>
- 599 Hickey G, Paten B, Earl D, et al (2013) HAL: a hierarchical format for storing and analyzing multiple genome
- 600 alignments. *Bioinformatics* 29:1341–1342. <https://doi.org/10.1093/bioinformatics/btt128>
- 601 Holohan EE, Kwong C, Adryan B, et al (2007) CTCF genomic binding sites in *Drosophila* and the organisation of
- 602 the bithorax complex. *PLoS genetics* 3:e112
- 603 Hubisz MJ, Pollard KS, Siepel A (2011) PHAST and RPHAST: phylogenetic analysis with space/time models.
- 604 *Brief Bioinform* 12:41–51. <https://doi.org/10.1093/bib/bbq072>
- 605 Hughes CL, Kaufman TC (2002) Hox genes and the evolution of the arthropod body plan. *Evolution &*
- 606 *development* 4:459–499

- 607 Ibragimov A, Bing XY, Shidlovskii Y, et al (2022) The insulating activity of the *Drosophila* BX-C chromatin  
608 boundary Fub-1 is parasegmentally regulated by lncRNA read-through. *bioRxiv*
- 609 Kahn TG, Savitsky M, Kuong C, et al (2023) Topological screen identifies hundreds of Cp190-and CTCF-  
610 dependent *Drosophila* chromatin insulator elements. *Science Advances* 9:eade0090
- 611 Kaushal A, Dorier J, Wang B, et al (2022) Essential role of Cp190 in physical and regulatory boundary formation.  
612 *Science Advances* 8:eabl8834
- 613 Kawahara AY, Plotkin D, Espeland M, et al (2019) Phylogenomics reveals the evolutionary timing and pattern of  
614 butterflies and moths. *Proceedings of the National Academy of Sciences* 116:22657–22663
- 615 Kitts PA, Church DM, Thibaud-Nissen F, et al (2016) Assembly: a resource for assembled genomes at NCBI.  
616 *Nucleic acids research* 44:D73–D80
- 617 Kosicki M, Tomberg K, Bradley A (2018) Repair of double-strand breaks induced by CRISPR–Cas9 leads to large  
618 deletions and complex rearrangements. *Nature biotechnology* 36:765–771
- 619 Kyrchanova O, Maksimenko O, Ibragimov A, et al (2020) The insulator functions of the *Drosophila* polydactyl  
620 C2H2 zinc finger protein CTCF: Necessity versus sufficiency. *Science advances* 6:eaaz3152
- 621 Lewis DL, DeCamillis MA, Brunetti CR, et al (1999) Ectopic gene expression and homeotic transformations in  
622 arthropods using recombinant Sindbis viruses. *Current Biology* 9:1279–1287.  
623 [https://doi.org/10.1016/S0960-9822\(00\)80049-4](https://doi.org/10.1016/S0960-9822(00)80049-4)
- 624 Lewis JJ, Reed RD (2018) Genome-wide regulatory adaptation shapes population-level genomic landscapes in  
625 *Heliconius*. *Molecular biology and evolution*
- 626 Livraghi L (2017) Hox3 duplication and divergence in the Lepidoptera. PhD Thesis, Oxford Brookes University
- 627 Livraghi L, Martin A, Gibbs M, et al (2017) CRISPR/Cas9 as the Key to Unlocking the Secrets of Butterfly Wing  
628 Pattern Development and Its Evolution. *Advances in Insect Physiology*
- 629 Lohse K, Mackintosh A, Vila R, Consortium DT of L (2021a) The genome sequence of the European peacock  
630 butterfly, *Aglais io* (Linnaeus, 1758). *Wellcome Open Research* 6:258
- 631 Lohse K, Wright C, Talavera G, et al (2021b) The genome sequence of the painted lady, *Vanessa cardui*  
632 Linnaeus 1758. *Wellcome Open Research* 6:324
- 633 Loker R, Sanner JE, Mann RS (2021) Cell-type-specific Hox regulatory strategies orchestrate tissue identity.  
634 *Current Biology* 31:4246–4255
- 635 Love MI, Huber W, Anders S (2014) Moderated estimation of fold change and dispersion for RNA-seq data with  
636 DESeq2. *Genome biology* 15:1–21
- 637 Lupiáñez DG, Kraft K, Heinrich V, et al (2015) Disruptions of topological chromatin domains cause pathogenic  
638 rewiring of gene-enhancer interactions. *Cell* 161:1012–1025
- 639 Maeda RK, Karch F (2015) The open for business model of the bithorax complex in *Drosophila*. *Chromosoma*  
640 124:293–307
- 641 Mahfooz N, Turchyn N, Mihajlovic M, et al (2007) Ubx regulates differential enlargement and diversification of  
642 insect hind legs. *PLoS One* 2:e866
- 643 Mallo M, Alonso CR (2013) The regulation of Hox gene expression during animal development. *Development*  
644 140:3951–3963
- 645 Martin A, Wolcott NS, O’Connell LA (2020) Bringing immersive science to undergraduate laboratory courses  
646 using CRISPR gene knockouts in frogs and butterflies. *Journal of Experimental Biology* 223:
- 647 Masumoto M, Yaginuma T, Niimi T (2009) Functional analysis of Ultrabithorax in the silkworm, *Bombyx mori*,  
648 using RNAi. *Development genes and evolution* 219:437–444
- 649 Matsuoka Y, Monteiro A (2018) Melanin pathway genes regulate color and morphology of butterfly wing scales.  
650 *Cell reports* 24:56–65
- 651 Matsuoka Y, Monteiro A (2021) Hox genes are essential for the development of eyespots in *Bicyclus anynana*  
652 butterflies. *Genetics* 217:iyaa005
- 653 Matsuoka Y, Monteiro A (2022) Ultrabithorax modifies a regulatory network of genes essential for butterfly  
654 eyespot development in a wing sector-specific manner. *Development* 149:dev200781
- 655 Matsuoka Y, Murugesan SN, Prakash A, Monteiro A (2022) Lepidopteran prolegs are novel traits, not leg  
656 homologs. *bioRxiv*
- 657 Mazo-Vargas A, Langmüller AM, Wilder A, et al (2022) Deep cis-regulatory homology of the butterfly wing pattern  
658 ground plan. *Science* 378:304–308
- 659 Méndez-González ID, Williams TM, Rebeiz M (2023) Changes in locus wide repression underlie the evolution of  
660 *Drosophila* abdominal pigmentation. *PLoS genetics* 19:e1010722
- 661 Merabet S, Carnesecchi J (2022) Hox dosage and morphological diversification during development and  
662 evolution. In: *Seminars in Cell & Developmental Biology*. Elsevier
- 663 Mitra S, Biswas A, Narlikar L (2018) DIVERSITY in binding, regulation, and evolution revealed from high-  
664 throughput ChIP. *PLoS Computational Biology* 14:e1006090
- 665 Moniot-Perron L, Moindrot B, Manceau L, et al (2023) The *Drosophila* Fab-7 boundary modulates Abd-B gene

- 666 activity by guiding an inversion of collinear chromatin organization and alternate promoter use. *Cell*  
667 *Reports* 42:111967
- 668 Mulhair P, Crowley L, Boyes DH, et al (2022) Diversity, duplication, and genomic organization of homeobox  
669 genes in Lepidoptera. *Genome Research* gr-277118
- 670 Mulhair PO, Holland PW (2022) Evolution of the insect Hox gene cluster: Comparative analysis across 243  
671 species. In: *Seminars in Cell & Developmental Biology*. Elsevier
- 672 Narendra V, Rocha PP, An D, et al (2015) CTCF establishes discrete functional chromatin domains at the Hox  
673 clusters during differentiation. *Science* 347:1017–1021
- 674 Natoli G, Andrau J-C (2012) Noncoding transcription at enhancers: general principles and functional models.  
675 *Annual review of genetics* 46:1–19
- 676 Nijhout HF, Rountree DB (1995) Pattern induction across a homeotic boundary in the wings of *Precis coenia*  
677 (Hbn.) (Lepidoptera: Nymphalidae). *International Journal of Insect Morphology and Embryology* 24:243–  
678 251
- 679 Owens DD, Caulder A, Frontera V, et al (2019) Microhomologies are prevalent at Cas9-induced larger deletions.  
680 *Nucleic acids research* 47:7402–7417
- 681 Pace RM, Grbić M, Nagy LM (2016) Composition and genomic organization of arthropod Hox clusters. *EvoDevo*  
682 7:1–11
- 683 Pang B, van Weerd JH, Hamoen FL, Snyder MP (2022) Identification of non-coding silencer elements and their  
684 regulation of gene expression. *Nature Reviews Molecular Cell Biology* 1–13
- 685 Paul R, Giraud G, Domsch K, et al (2021) Hox dosage contributes to flight appendage morphology in *Drosophila*.  
686 *Nature Communications* 12:2892
- 687 Pease B, Borges AC, Bender W (2013) Noncoding RNAs of the Ultrabithorax domain of the *Drosophila* bithorax  
688 complex. *Genetics* 195:1253–1264
- 689 Postika N, Metzler M, Affolter M, et al (2018) Boundaries mediate long-distance interactions between enhancers  
690 and promoters in the *Drosophila* Bithorax complex. *PLoS genetics* 14:e1007702
- 691 Prasad N, Tarikere S, Khanale D, et al (2016) A comparative genomic analysis of targets of Hox protein  
692 Ultrabithorax amongst distant insect species. *Scientific reports* 6:27885
- 693 Ramírez F, Bhardwaj V, Arrigoni L, et al (2018) High-resolution TADs reveal DNA sequences underlying genome  
694 organization in flies. *Nature communications* 9:189
- 695 Refki PN, Armisen D, Crumière AJJ, et al (2014) Emergence of tissue sensitivity to Hox protein levels underlies  
696 the evolution of an adaptive morphological trait. *Developmental biology* 392:441–453
- 697 Savitsky M, Kim M, Kravchuk O, Schwartz YB (2016) Distinct roles of chromatin insulator proteins in control of the  
698 *Drosophila* bithorax complex. *Genetics* 202:601–617
- 699 Seal RL, Tweedie S, Bruford EA (2022) A standardised nomenclature for long non-coding RNAs. *IUBMB life*
- 700 Segert JA, Gisselbrecht SS, Bulyk ML (2021) Transcriptional silencers: Driving gene expression with the brakes  
701 on. *Trends in Genetics* 37:514–527
- 702 Shin HY, Wang C, Lee HK, et al (2017) CRISPR/Cas9 targeting events cause complex deletions and insertions at  
703 17 sites in the mouse genome. *Nature communications* 8:15464
- 704 Shippy TD, Ronshaugen M, Cande J, et al (2008) Analysis of the *Tribolium* homeotic complex: insights into  
705 mechanisms constraining insect Hox clusters. *Development genes and evolution* 218:127–139
- 706 Sibatani A (1980) Wing homoeosis in Lepidoptera: a survey. *Developmental Biology* 79:1–18
- 707 Sibatani A (1983) A compilation of data on wing homoeosis in Lepidoptera. *J Res Lepidop* 22:1–46
- 708 Siepel A, Bejerano G, Pedersen JS, et al (2005) Evolutionarily conserved elements in vertebrate, insect, worm,  
709 and yeast genomes. *Genome Res* 15:1034–1050. <https://doi.org/10.1101/gr.3715005>
- 710 Srinivasan A, Mishra RK (2020) Lessons on gene regulation learnt from the *Drosophila melanogaster* bithorax  
711 complex. *International Journal of Developmental Biology* 64:151–158
- 712 Stadler MR, Haines JE, Eisen MB (2017) Convergence of topological domain boundaries, insulators, and  
713 polytene interbands revealed by high-resolution mapping of chromatin contacts in the early *Drosophila*  
714 *melanogaster* embryo. *Elife* 6:e29550
- 715 Statello L, Guo C-J, Chen L-L, Huarte M (2021) Gene regulation by long non-coding RNAs and its biological  
716 functions. *Nature reviews Molecular cell biology* 22:96–118
- 717 Tendolkar A, Pomerantz AF, Heryanto C, et al (2021) Ultrabithorax Is a Micromanager of Hindwing Identity in  
718 Butterflies and Moths. *Front Ecol Evol* 9. <https://doi.org/10.3389/fevo.2021.643661>
- 719 Thomas JA, Frandsen PB, Prendini E, et al (2020) A multigene phylogeny and timeline for Trichoptera (Insecta).  
720 *Systematic Entomology* 45:670–686
- 721 Tomoyasu Y (2017) Ultrabithorax and the evolution of insect forewing/hindwing differentiation. *Current opinion in*  
722 *insect science* 19:8–15
- 723 Tong X, Hrycaj S, Podlaha O, et al (2014) Over-expression of Ultrabithorax alters embryonic body plan and wing  
724 patterns in the butterfly *Bicyclus anynana*. *Developmental biology* 394:357–366

- 725 Tong XL, Fu MY, Chen P, et al (2017) Ultrabithorax and abdominal-A specify the abdominal appendage in a  
726 dosage-dependent manner in silkworm, *Bombyx mori*. *Heredity* 118:578
- 727 Van Belleghem SM, Ruggieri AA, Concha C, et al (2023) High level of novelty under the hood of convergent  
728 evolution. *Science* 379:1043–1049
- 729 van der Burg KR, Lewis JJ, Brack BJ, et al (2020) Genomic architecture of a genetically assimilated seasonal  
730 color pattern. *Science* 370:721–725
- 731 van der Burg KR, Lewis JJ, Martin A, et al (2019) Contrasting roles of transcription factors Spineless and EcR in  
732 the highly dynamic chromatin landscape of butterfly wing metamorphosis. *Cell reports* 27:1027–1038
- 733 Wang H, Hu H, Xiang Z, et al (2019) Identification and characterization of a new long noncoding RNA *iab-1* in the  
734 Hox cluster of silkworm, *Bombyx mori* identification of *iab-1*. *Journal of Cellular Biochemistry* 120:17283–  
735 17292. <https://doi.org/10.1002/jcb.28990>
- 736 Wang H, Tong X, Liu M, et al (2017) Fine mapping of a degenerated abdominal legs mutant (*Edl*) in silkworm,  
737 *Bombyx mori*. *Plos one* 12:e0169224
- 738 Wang S, Teng D, Li X, et al (2022) The evolution and diversification of oakleaf butterflies. *Cell* 185:3138–3152
- 739 Warren RW, Nagy L, Selegue J, et al (1994) Evolution of homeotic gene regulation and function in flies and  
740 butterflies. *Nature* 372:458
- 741 Weatherbee SD, Frederik Nijhout H, Grunert LW, et al (1999) Ultrabithorax function in butterfly wings and the  
742 evolution of insect wing patterns. *Current Biology* 9:109–115. [https://doi.org/10.1016/S0960-  
743 9822\(99\)80064-5](https://doi.org/10.1016/S0960-9822(99)80064-5)
- 744 Weatherbee SD, Halder G, Kim J, et al (1998) Ultrabithorax regulates genes at several levels of the wing-  
745 patterning hierarchy to shape the development of the *Drosophila* haltere. *Genes & Development* 12:1474–  
746 1482. <https://doi.org/10.1101/gad.12.10.1474>
- 747 Wootton RJ (1993) Leading edge section and asymmetric twisting in the wings of flying butterflies (Insecta,  
748 Papilionoidea)
- 749 Yang J, Wan W, Xie M, et al (2020) Chromosome-level reference genome assembly and gene editing of the  
750 dead-leaf butterfly *Kallima inachus*. *Molecular Ecology Resources* 20:1080–1092
- 751 Zhang L, Steward RA, Wheat CW, Reed RD (2021) High-quality genome assembly and comprehensive  
752 transcriptome of the painted lady butterfly *Vanessa cardui*. *Genome biology and evolution* 13:evab145
- 753 Zhang X, Wang W, Zhu W, et al (2019) Mechanisms and functions of long non-coding RNAs at multiple regulatory  
754 levels. *International journal of molecular sciences* 20:5573
- 755 Zheng Z, Khoo A, Fambrough Jr D, et al (1999) Homeotic gene expression in the wild-type and a homeotic  
756 mutant of the moth *Manduca sexta*. *Development genes and evolution* 209:460–472
- 757 Zuccaro MV, Xu J, Mitchell C, et al (2020) Allele-specific chromosome removal after Cas9 cleavage in human  
758 embryos. *Cell* 183:1650–1664



759  
760  
761

## SUPPLEMENTARY INFORMATION

| Species                                | sgRNA name         | Target Sequence (5' to 3')<br>PAM sequence not shown |
|----------------------------------------|--------------------|------------------------------------------------------|
| <i>J. coenia</i>                       | <i>Antp-Ubx_BE</i> | CTCGAATATGGAGATATCGG                                 |
|                                        | <i>UbxCRE11a3</i>  | ACGGACCTCCGCTTTCCTGG                                 |
|                                        | <i>UbxCRE11c6</i>  | AAC TGGTGCAGTGCCTTGTA                                |
| <i>J. coenia</i><br>+ <i>V. cardui</i> | <i>UbxCRE11a2</i>  | CTACTCTGTTCCGACATTCG                                 |
|                                        | <i>UbxCRE11c5</i>  | GCTGCCGCGAGTCTGAATCG                                 |
|                                        | <i>UbxCRE11b9</i>  | TTCATGTATGAACCATGACG                                 |
|                                        | <i>UbxIT1#1</i>    | CCTTCGCATAAGTTCGGATAGG                               |
| <i>V. cardui</i>                       | <i>Bxd1</i>        | TATCGGTCGTTTCGTACACA                                 |
|                                        | <i>UbxIT1#2</i>    | CTCGGCTATGTGTCGAGGGC                                 |

**Table S1. List of sgRNAs used in CRISPR experiments.**

762  
763  
764  
765

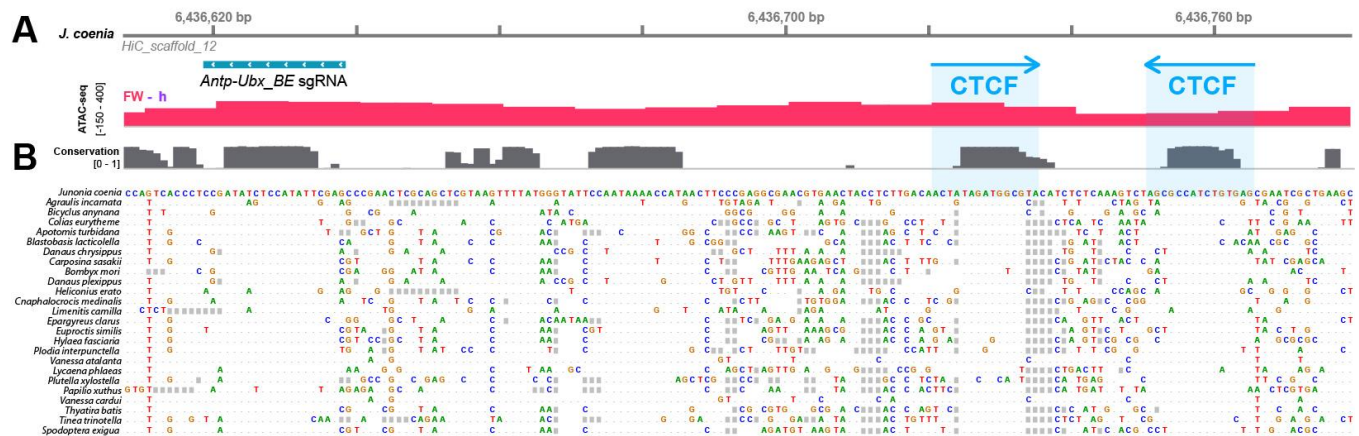

**Figure S1. Prediction of two conserved CTCF binding sites at *Antp-Ubx\_BE*.** (A) Sequence-level view of a 180-bp genomic interval including the *Antp-Ubx\_BE* sgRNA (turquoise) in *J. coenia*, overlapping with an ATAC-seq peak of forewing-enriched chromatin opening (red). The CRISPR target is about 100 bp away from two predicted binding sites for the *Drosophila* CTCF insulator protein. (B) High-level of nucleotide conservation at the sgRNA site and CTCF motifs across Lepidoptera and Trichoptera representative genomes, indicative of functional constraints on these sequences.

766  
767  
768  
769  
770  
771  
772

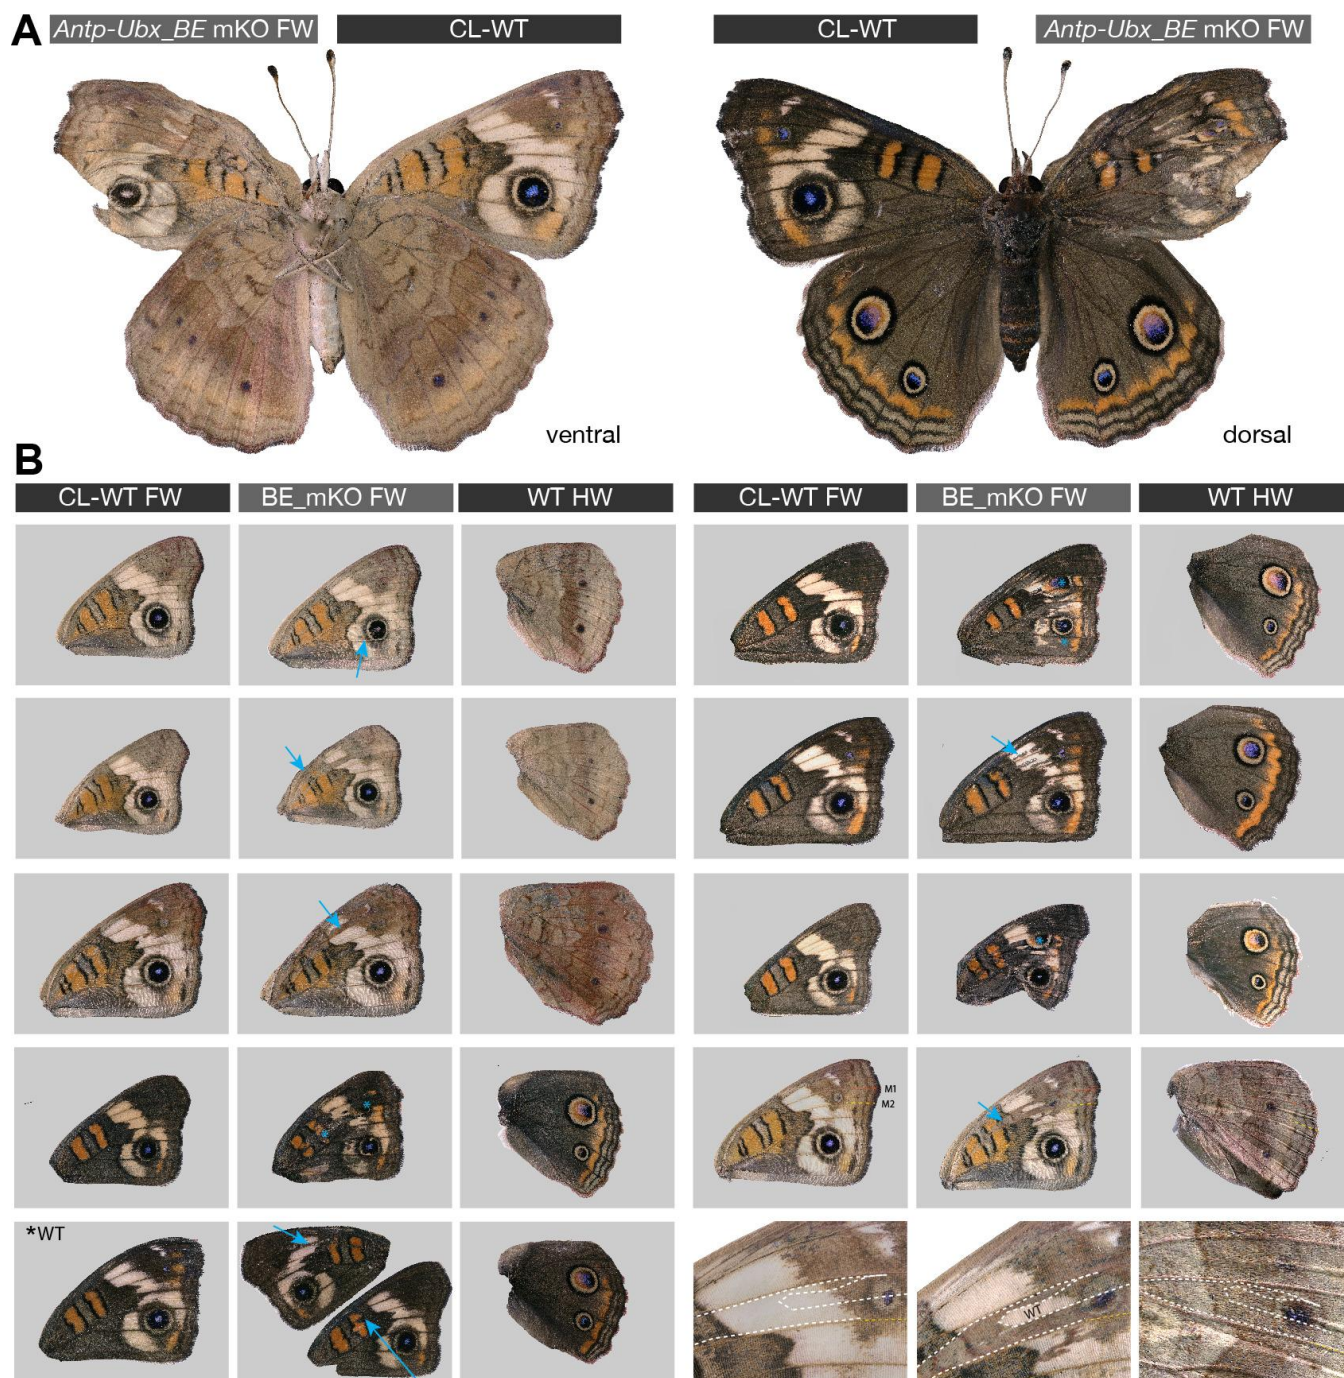

773  
774  
775  
776  
777  
778  
779  
780

**Figure S2. CRISPR perturbation of the *Antp-Ubx* boundary element results in FW-to-HW homeosis.** (A) Example of an *Antp-Ubx\_BE* crisprant with a unilateral phenotype on the right forewing. (B) Additional examples of forewing homeoses in *Antp-Ubx\_BE* crisprant. Wing sets (forewing mKO mutants and corresponding contralateral WT) are shown with one of the wings horizontally flipped to show the mutant wings in left-to-right orientation.. Cyan arrows : small mutant clones. Cyan asterisks : large mutant clones.



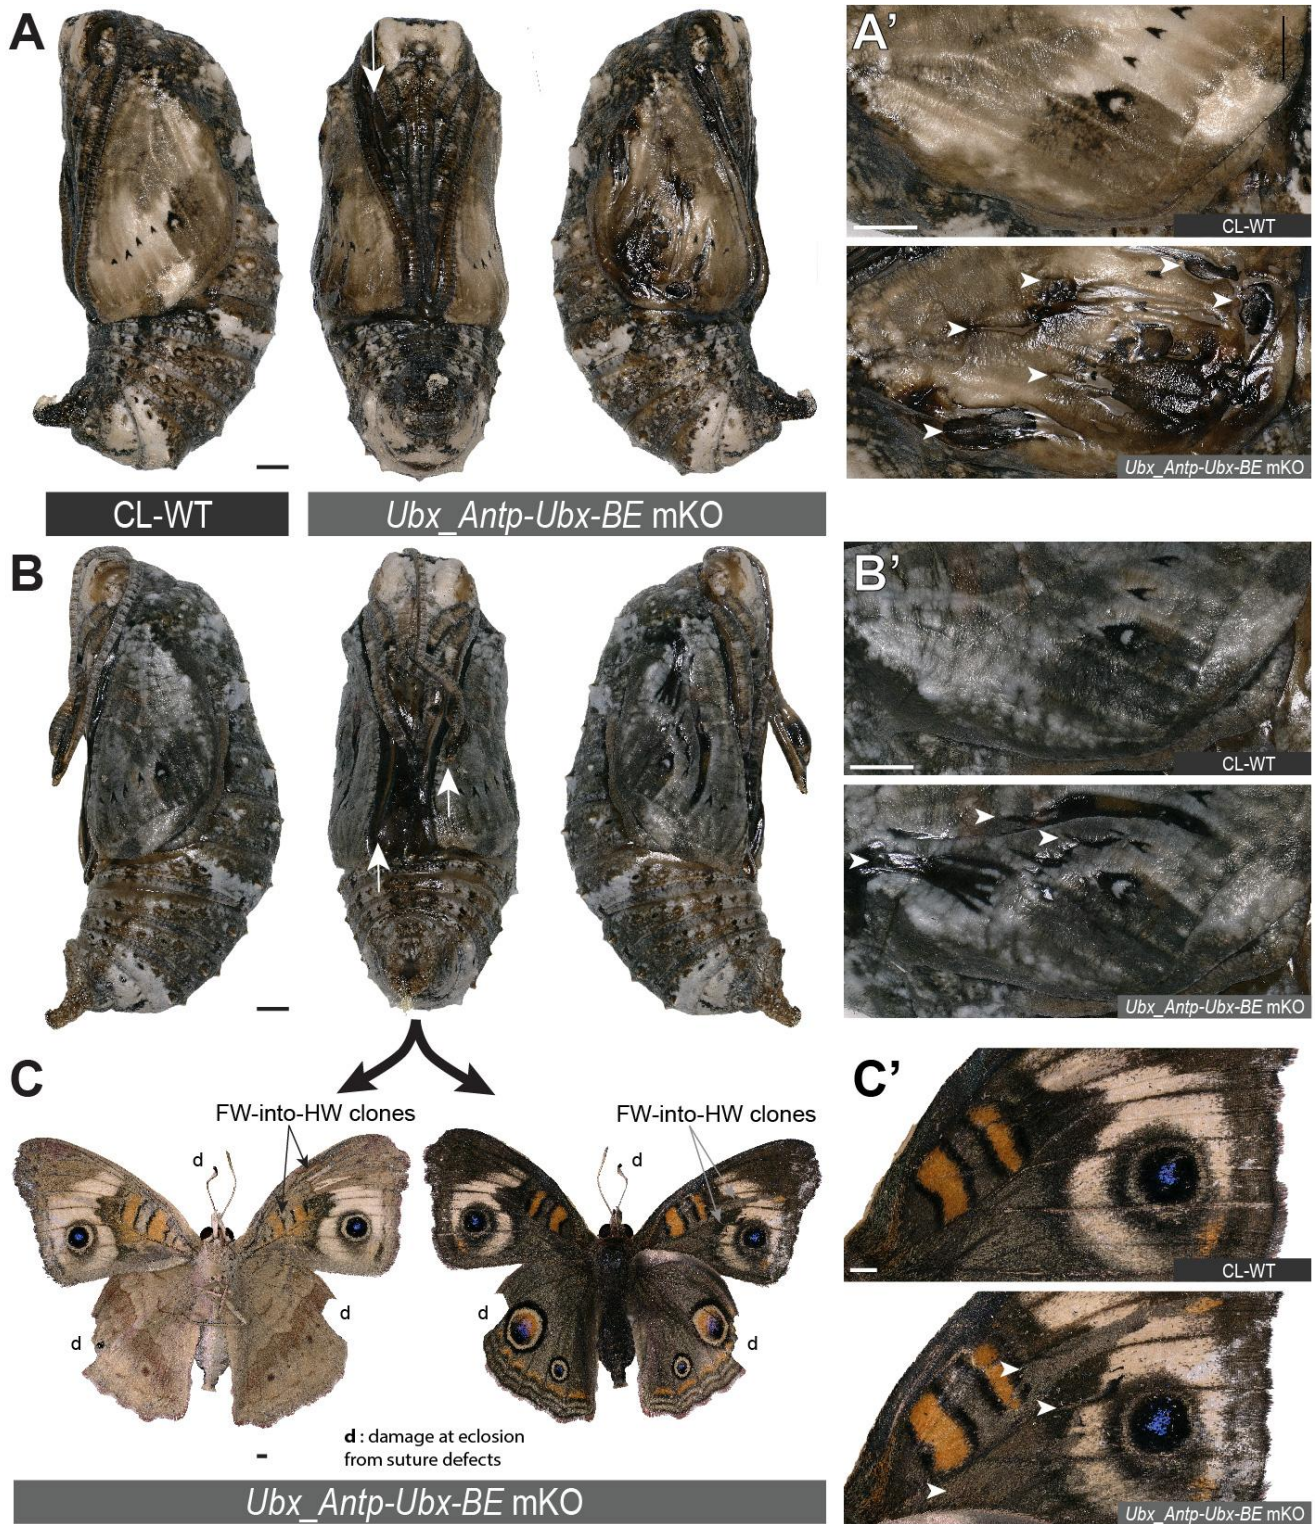

781  
782  
783  
784  
785  
786  
787

**Figure S3. Pupal defects following FW→HW homeosis in *Antp-Ubx\_BE* crispants.** (A-B) Contralateral (CL) and, forewing mosaicic knockout (mKO) mutants following CRISPR targeting of *Antp-Ubx\_BE* in *J. coenia*. The two pupae show suture defects in the midline appendages (arrows). (A'-B') Magnified views of the crispant forewings, showing defective cuticle (arrowheads). (C-C') Crispant adult butterfly emerged from the pupa in panel B. White arrowheads in C' highlight the match between dorsal forewing clones and the pupal forewing cuticle defects shown in B'. Scale bars : 1 mm.



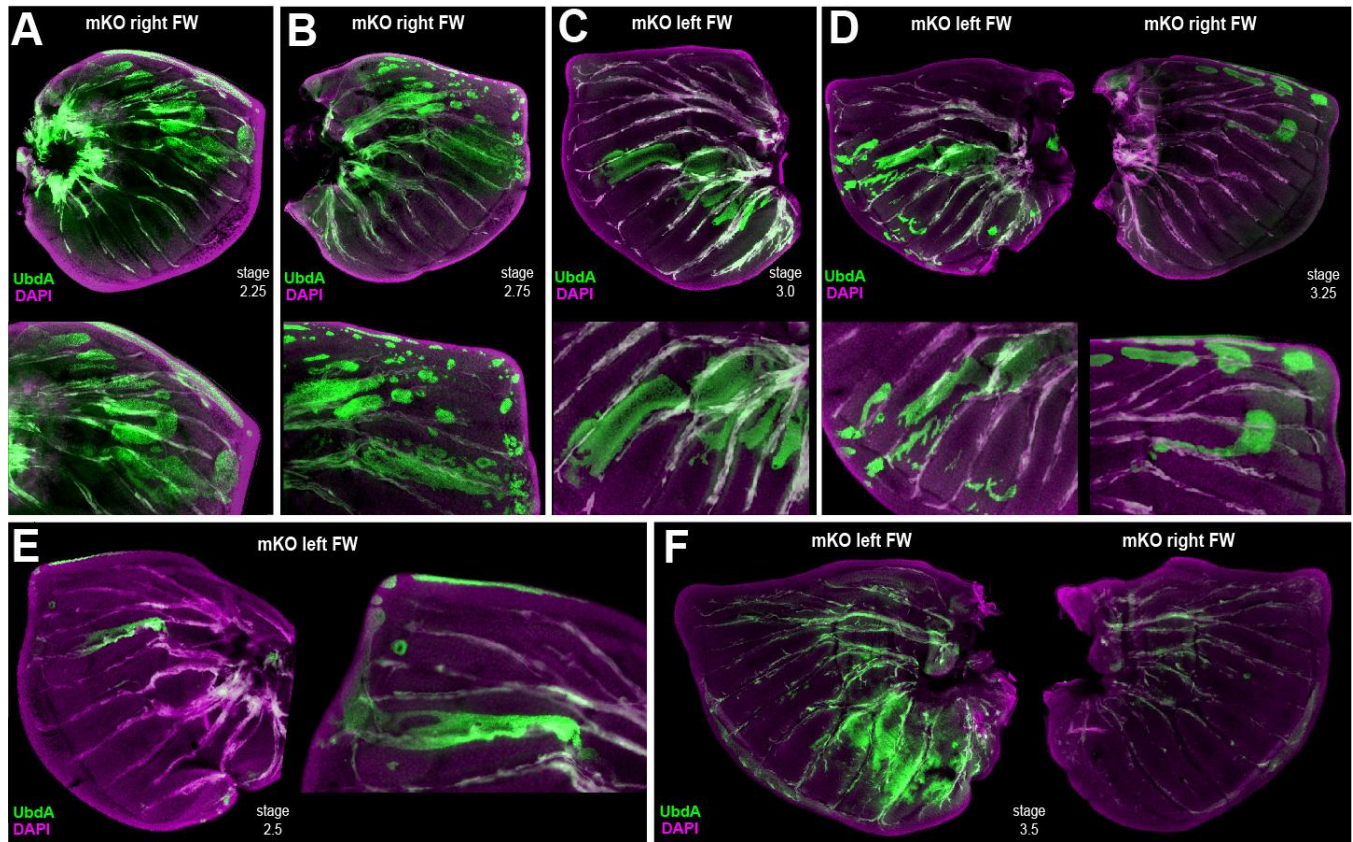

788

789

790

791

792

793

794

**Figure S4. Additional examples of ectopic UbdA and FW→HW homeosis in *Antp-Ubx\_BE* crispant larval forewings.** (A-F) Each panel shows forewings with ectopic detection of UbdA (FP6.87 monoclonal antibody, green), dissected at the fifth instar stage. Panels D and F are wing sets from individual crispants. Panels E and C are mutant contralateral wings of the mutant forewings shown in Figs. 4D and E, respectively.

795

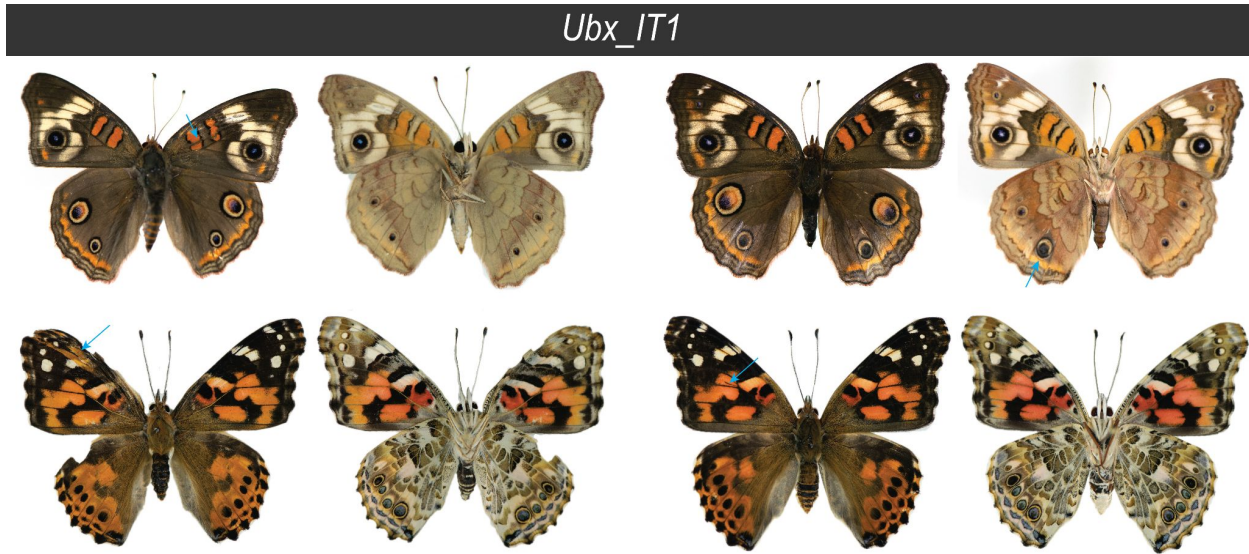

796

797

798

799

**Figure S5. Additional mutant phenotypes from CRISPR-mediated interrogation of *lncRNA\_Ubx-IT1* 5' region in *J. coenia* (top) and *V. cardui* (bottom). Cyan arrows : mutant clones.**

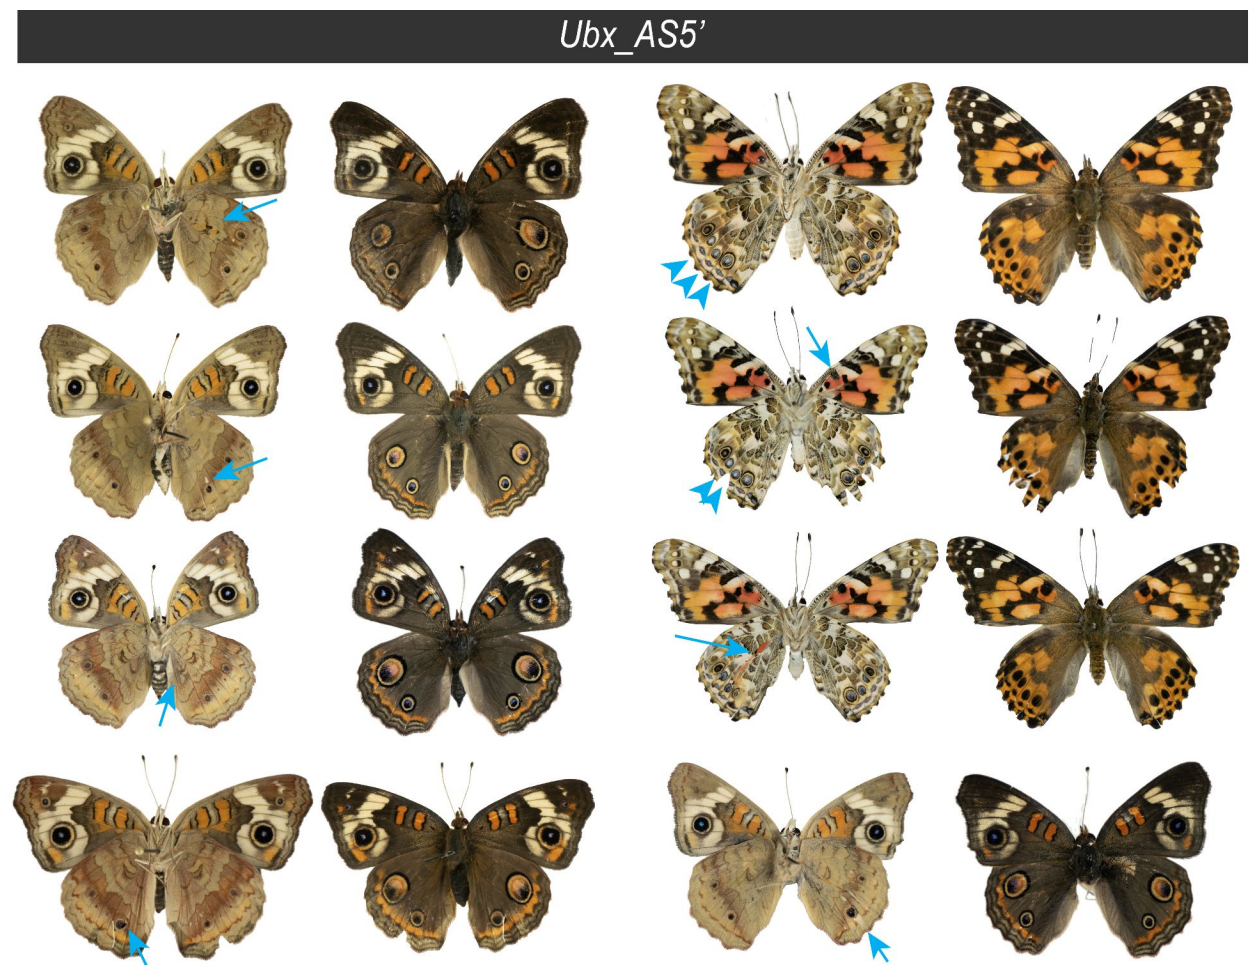

800

801

802

**Figure S6. Additional mutant phenotypes from CRISPR-mediated interrogation of the *lncRNA\_Ubx-AS5'* region in *J. coenia* and *V. cardui*. Cyan arrows : mutant clones. Cyan arrowheads : white eyespot foci.**



803  
804  
805

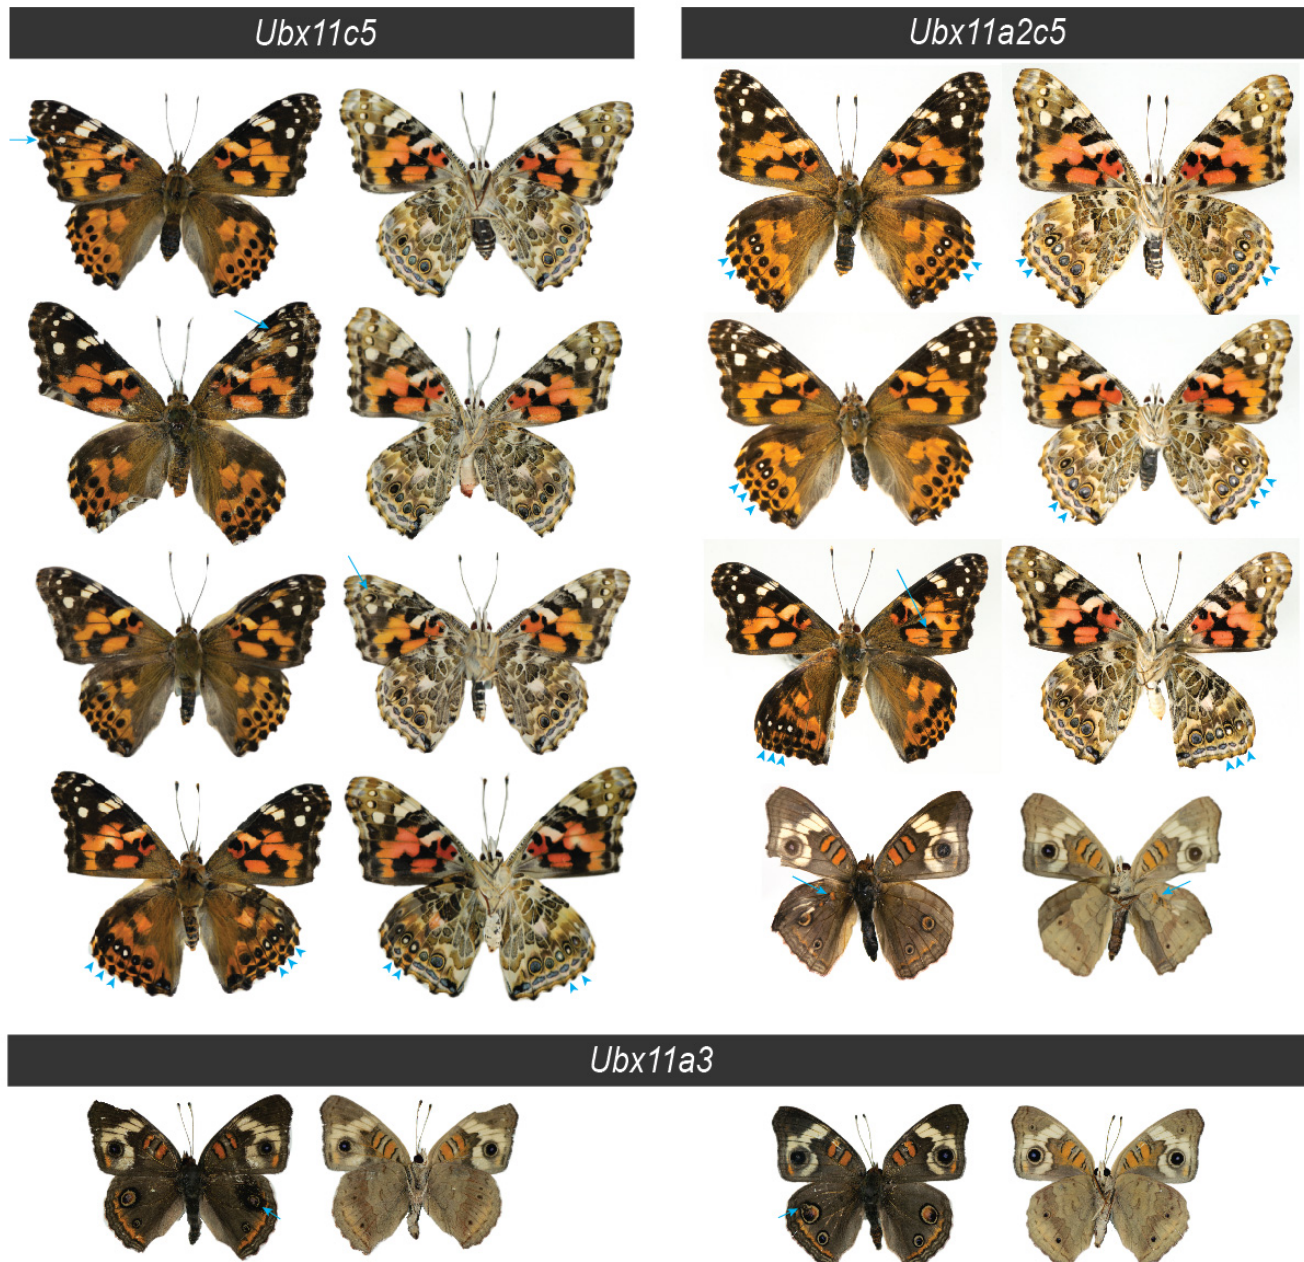

806  
807  
808  
809

**Figure S7. Additional mutant phenotypes from CRISPR-mediated interrogation of *CRM11* in *J. coenia* and *V. cardui* show bidirectional homeoses and non-homeotic eyespot changes.** Cyan arrows : mutant clones. Cyan arrowheads : white eyespot foci.

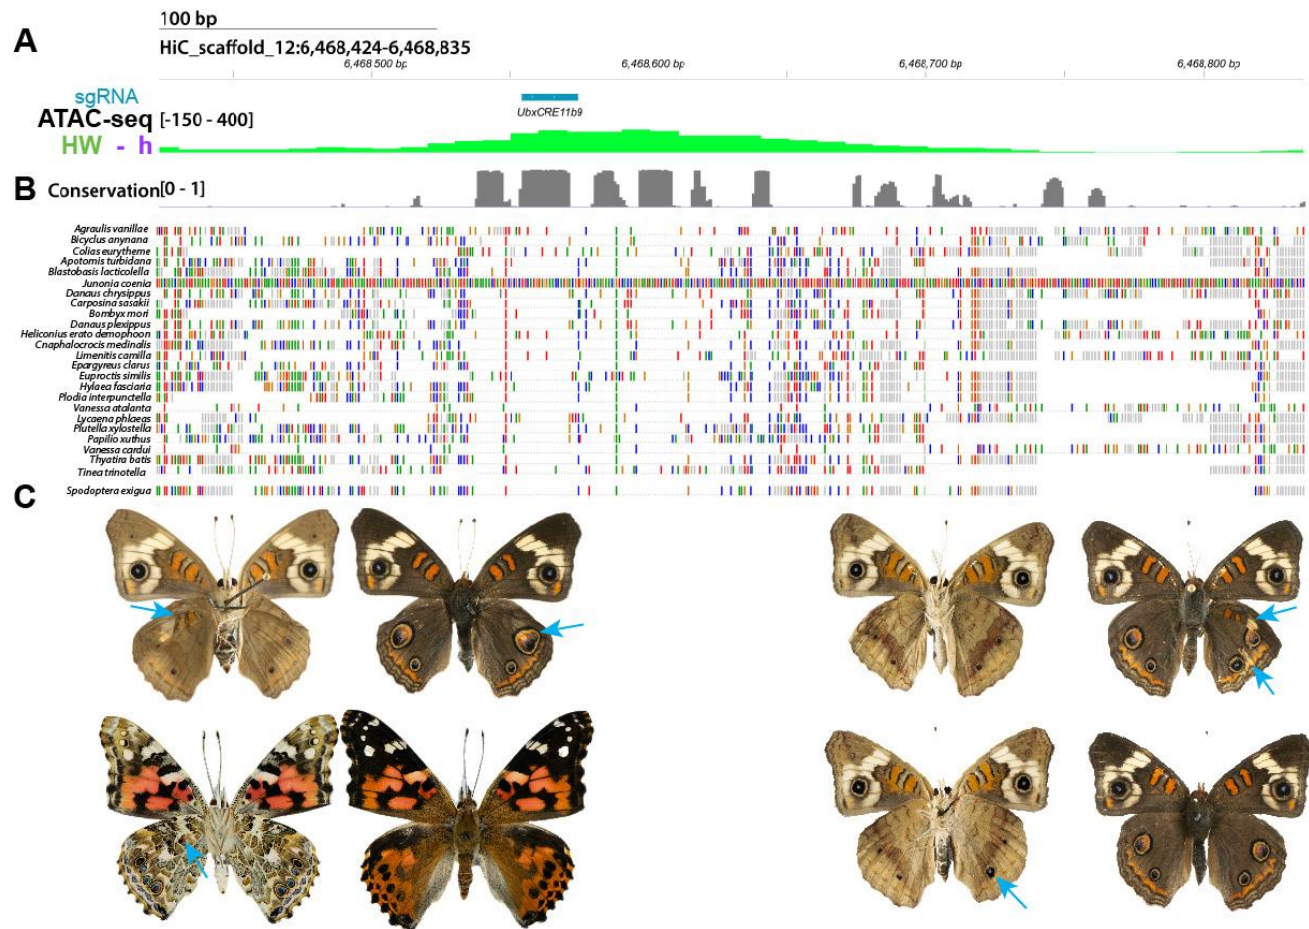

810

811

**Figure S8. CRISPR perturbation of the conserved *Ubx\_CRE11b* results in HW→FW homeoses.** (A-B) The *UbxCRE11b9* sgRNA targets a hindwing-enriched ATAC peak with strong conservation across genomes from 23 Lepidoptera and 2 Trichoptera species (gray : PhastCons scores). Colored bars denote variation from the *J. coenia* reference (C) *Jc\_UbxCRE\_11b9* crisprant butterflies exclusively showed HW→FW transformed clones (cyan arrows in both *J. coenia* and *V. cardui*).

815

816

817

818

819



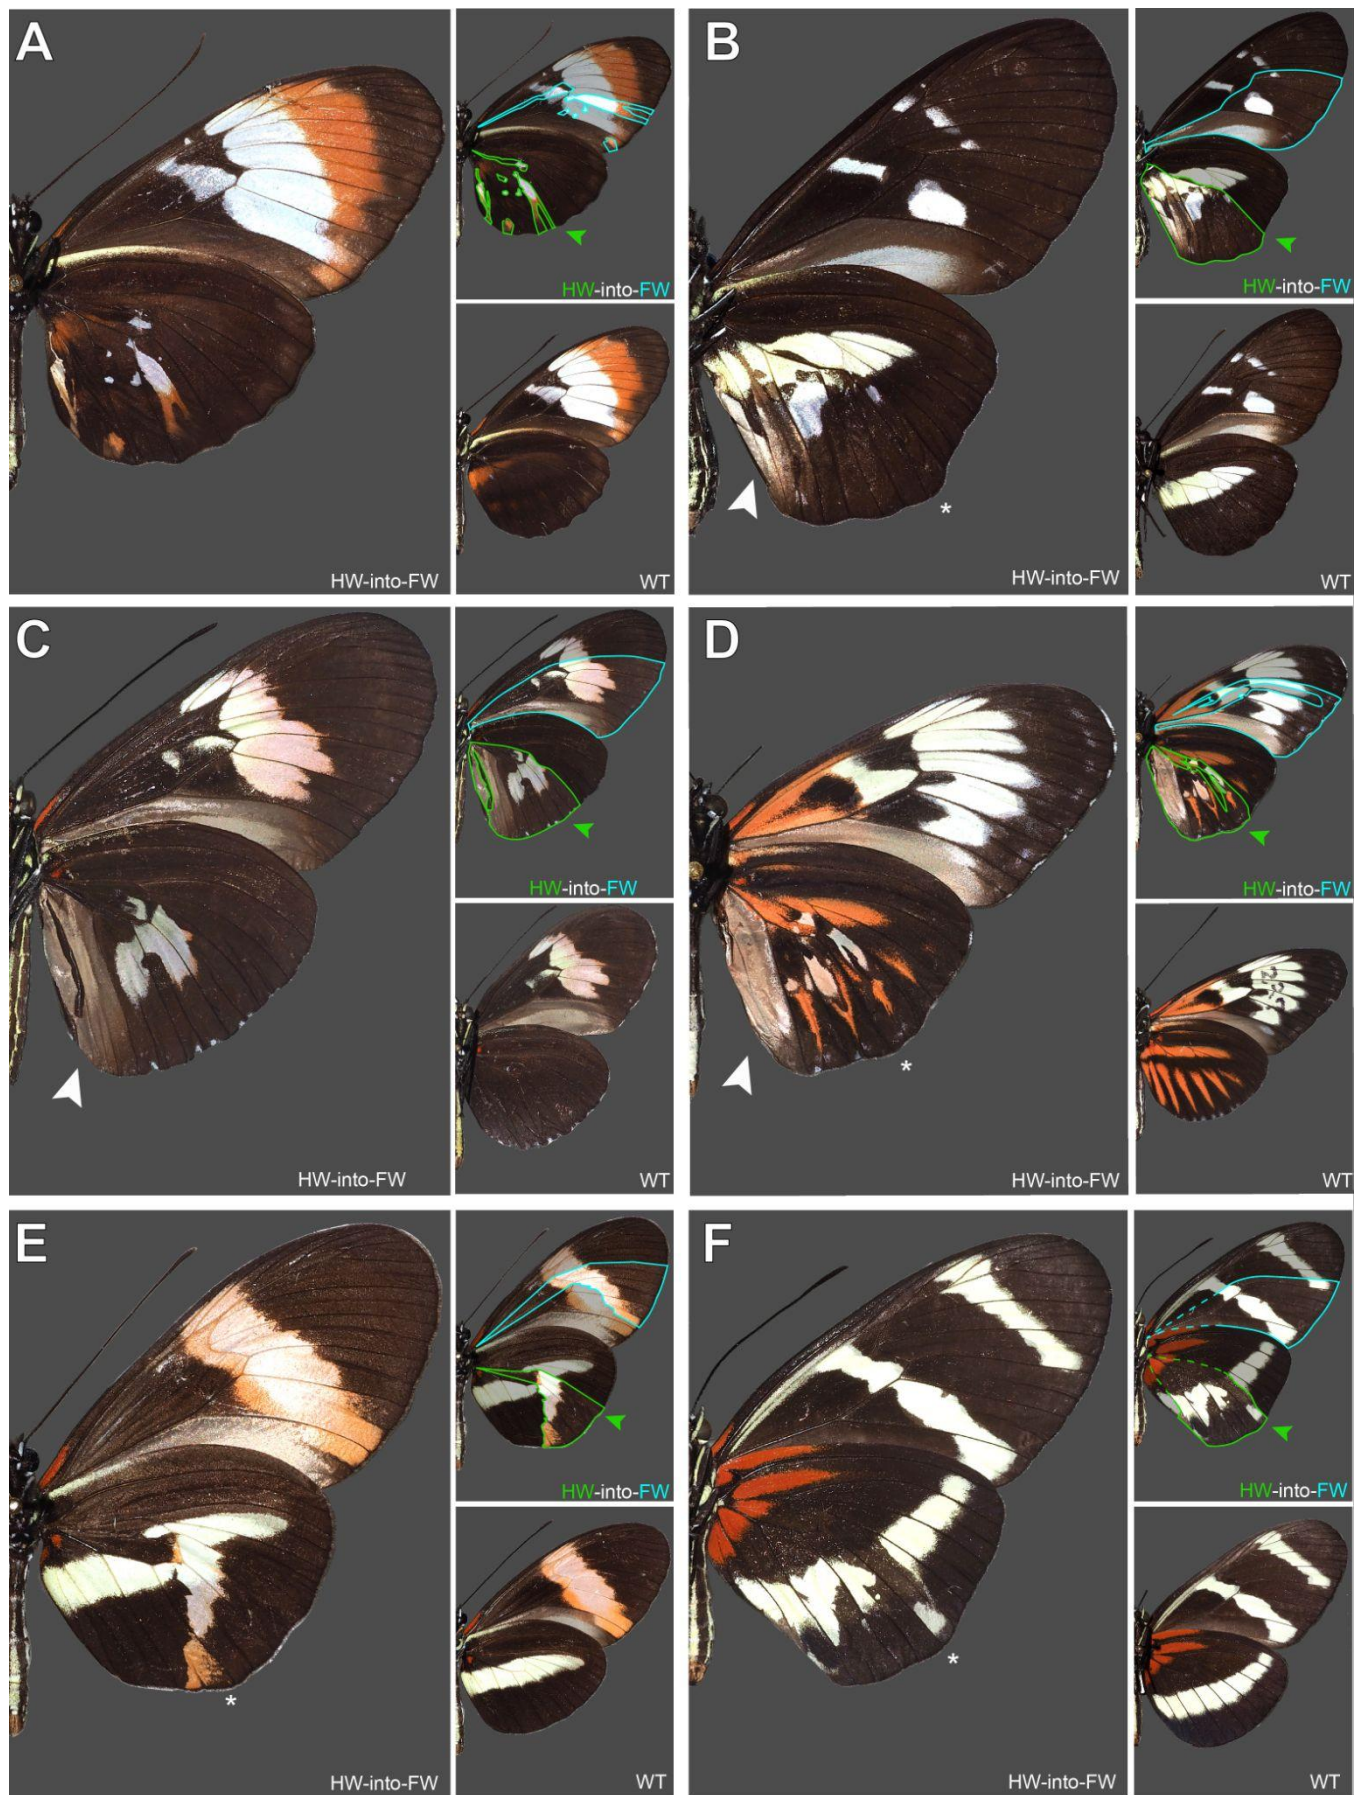



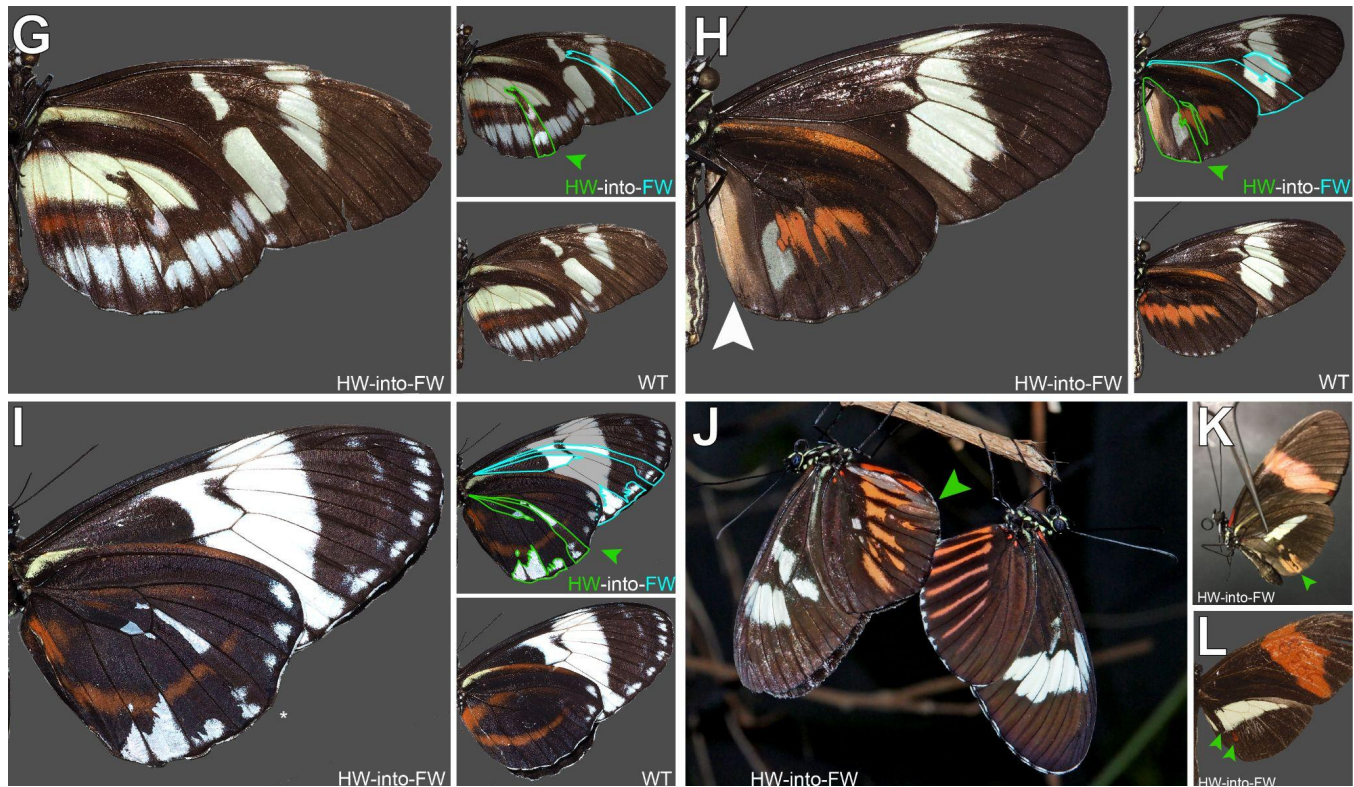

821

822

823

824

825

826

827

828

829

830

831

832

833

834

835

836

**Figure S9 (previous page, continued above).** Hindwing homeoses in *Heliconius* butterfly spontaneous mutants from pure stocks, hybrid cultures and wild-caught individuals from the L.E. Gilbert collection (UT Austin). White arrowheads: homeotic clones including the acquisition of ventral forewing coupling scales. Asterisks: local deformation of hindwings relative to wild-type. All hindwing homeoses are ventral except in panel L. **A.** *Heliconius cydno galanthus* x *H. melpomene rosina* (Costa Rica), cross J31, August 1987. **B.** *Heliconius cydno gustavi*, captive stock from Saladito (Colombia), September 1991. **C.** *Heliconius melpomene madeira* (Brazil) x *Heliconius melpomene plesseni* (Ecuador), September 2012. **D.** *H. m. rosina* (Costa Rica) x *Heliconius melpomene madeira* (Brazil) x *H. cydno galanthus* (Costa Rica) mixed population, December 2015. **E.** *H. m. rosina*, captive stock from Osa Peninsula (Costa Rica), September 1991. **F.** *Heliconius hewitsoni*, captive stock from Osa Peninsula (Costa Rica), July 2005. **G.** *Heliconius cydno cydnides*, captive stock from natural hybrid zone in Dagua Pass (Colombia), May 1989. **H.** *H. m. rosina* (Costa Rica) x *H. m. madeira* (Brazil) x *H. c. galanthus* (Costa Rica) mixed population, June 2016. **I.** *H. c. galanthus* x *H. m. rosina* crossed three times, and back to *H. c. galanthus*, August 2014. **J.** *Heliconius melpomene malleti* (Ecuador) x *H. m. plesseni* (Ecuador) hybrid stock, 2010. **K.** *H. m. rosina* captive stock, Costa Rica. **L.** *H. m. rosina* captive stock, Osa Peninsula (Costa Rica), March 1987, in dorsal view.
